# Supplementary material for: Highly efficient asymmetric aldol reaction in brine using a fluorous sulfonamide organocatalyst
Source: Royal Society of Chemistry journal article supplement (doi:10.1039/c2ob06955e), 2012-01-01

## Electronic Supplementary Information (ESI)

### Highly Efficient Asymmetric Aldol Reaction in Brine Using Fluorous Sulfonamide Organocatalyst

Tsuyoshi Miura<sup>†\*</sup>, Hikaru Kasuga<sup>†</sup>, Kie Imai<sup>†</sup>, Mariko Ina<sup>†</sup>, Norihiro Tada<sup>†</sup>, Nobuyuki Imai<sup>‡</sup>,  
Akichika Itoh<sup>†</sup>

<sup>†</sup> *Gifu Pharmaceutical University, 1-25-4 Daigaku-nishi, Gifu, 501-1196, Japan*

<sup>‡</sup> *Faculty of Pharmacy, Chiba Institute of Science, 15-8 Shiomi-cho, Choshi, Chiba 288-0025, Japan*  
*E-mail: [miura@gifu-pu.ac.jp](mailto:miura@gifu-pu.ac.jp);*

|    |                                                             |       |
|----|-------------------------------------------------------------|-------|
| 1. | General Information                                         | SI-2  |
| 2. | Preparation of fluorous organocatalyst <b>4</b>             | SI-2  |
| 3. | Procedure for recycling and reusing fluorous organocatalyst | SI-4  |
| 4. | HPLC Data for aldol products                                | SI-4  |
| 5. | References                                                  | SI-8  |
| 5. | <sup>1</sup> H and <sup>13</sup> C NMR spectra              | SI-9  |
| 6. | HPLC charts                                                 | SI-21 |

## 1. General Information.

$^1\text{H}$  NMR and  $^{13}\text{C}$  NMR spectra were measured with a JEOL AL 400 spectrometer (400 MHz for  $^1\text{H}$  NMR and 100 MHz for  $^{13}\text{C}$  NMR), or JEOL ECA-500 spectrometer (500 MHz for  $^1\text{H}$  NMR and 125 MHz for  $^{13}\text{C}$  NMR). The chemical shifts are expressed in ppm downfield from tetramethylsilane ( $\delta = 0.00$ ) as an internal standard. For thin layer chromatographic (TLC) analyses, Merck precoated TLC plates (silica gel 60 F<sub>254</sub>, Art 5715) were used. The products were isolated by flash column chromatography on silica gel (Kanto Chemical, silica gel 60N, spherical, neutral, 40-50  $\mu\text{m}$ ).

## 2. Preparation of fluoros organocatalyst 4

### 2-1. Compound 9

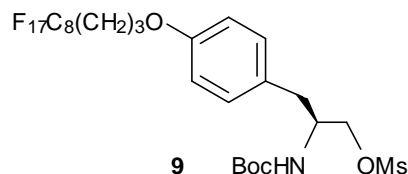

To a solution of compound **8**<sup>1</sup> (1.85 g, 2.54 mmol) in dry THF (18 mL) were added triethylamine (0.71 mL, 5.09 mmol) and methanesulfonyl chloride (236  $\mu\text{L}$ , 3.05 mmol) at room temperature. After stirring for 2.5 h at room temperature, the reaction mixture was added to water and extracted three times with AcOEt. The AcOEt layers were combined, washed with brine, dried over anhydrous MgSO<sub>4</sub>, and evaporated. Hexane was added to the residue, and the precipitate was collected over grass filter. The precipitate was washed with hexane to give compound **9** (2.01 g, 98%) as a white powder. Mp 108-110 °C;  $[\alpha]_{\text{D}}^{19} = -7.3^\circ$  (c 0.50, CHCl<sub>3</sub>);  $^1\text{H}$  NMR (500 MHz, CDCl<sub>3</sub>):  $\delta = 1.42$  (s, 9H), 2.08-2.12 (m, 2H), 2.26-2.36 (m, 2H), 2.79 (dd,  $J = 8.1, 13.7$  Hz, 1H), 2.85-2.89 (m, 1H), 3.02 (s, 3H), 4.02 (t,  $J = 6.3$  Hz, 2H), 4.05 (brs, 1H), 4.11 (dd,  $J = 4.0, 10.3$  Hz, 1H), 4.23 (brs, 1H), 4.72 (brs, 1H), 6.85 (d,  $J = 8.5$  Hz, 2H), 7.13 (d,  $J = 8.5$  Hz, 2H);  $^{13}\text{C}$  NMR (125 MHz, CDCl<sub>3</sub>):  $\delta = 20.7, 27.9$  (t,  $^2J_{\text{C-F}} = 21.5$  Hz), 28.3, 36.2, 37.2, 50.9, 66.3, 69.7, 80.0, 114.7, 128.9, 130.3, 155.1, 157.6; Anal. Calcd for C<sub>26</sub>H<sub>28</sub>F<sub>17</sub>NO<sub>6</sub>S: C, 38.77; H, 3.50; N, 1.74. Found: C, 38.52; H, 3.34; N, 1.75.

### 2-2. Compound 10

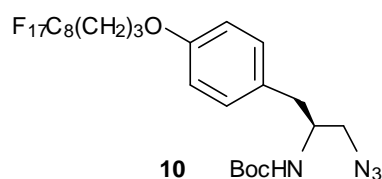

To a solution of compound **9** (1.99 g, 2.47 mmol) in dry DMF (15 mL) was added NaN<sub>3</sub> (241 mg, 3.71 mmol) at room temperature. After stirring for 3 days at 80 °C, the reaction mixture was added to water and extracted with AcOEt. The AcOEt layers were washed with water and brine, dried over anhydrous MgSO<sub>4</sub>, and evaporated. The residue was purified by flash column chromatography on silica gel with a 9:1 mixture of hexane and AcOEt to give the pure **10** (1.58 g, 85%) as a white powder. Mp 74-76 °C;  $[\alpha]_{\text{D}}^{18} = -1.9^\circ$  (c 0.50, CHCl<sub>3</sub>);  $^1\text{H}$  NMR (500 MHz, CDCl<sub>3</sub>):  $\delta = 1.43$  (s, 9H), 2.07-2.12 (m, 2H), 2.26-2.36 (m, 2H), 2.72 (dd,  $J = 8.0, 13.8$  Hz, 1H), 2.80-2.84 (m, 1H), 3.29 (dd,  $J = 4.0, 12.0$  Hz, 1H), 3.40-3.43 (m, 1H), 3.92 (brs, 1H), 4.02 (t,  $J = 5.7$  Hz, 2H), 4.63 (brs, 1H), 6.84 (d,  $J = 8.6$  Hz, 2H), 7.11 (d,  $J = 8.6$  Hz, 2H);  $^{13}\text{C}$  NMR (125 MHz, CDCl<sub>3</sub>):  $\delta = 20.6, 27.9$  (t,  $^2J_{\text{C-F}} = 21.0$  Hz), 28.3, 37.2, 51.4, 53.0, 66.3, 79.8,

114.6, 129.5, 130.3, 155.1, 157.4; Anal. Calcd for  $C_{25}H_{25}F_{17}N_4O_3$ : C, 39.00; H, 3.35; N, 7.45. Found: C, 39.78; H, 3.18; N, 7.22.

### 2-3. Compound 11

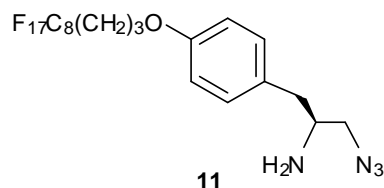

To a solution of compound **10** (1.03 g, 1.36 mmol) in AcOEt (7 mL) was added 2.5 mL of a 4M solution of hydrochloric acid in AcOEt at 0 °C. After stirring for 3 h at room temperature, the reaction mixture was evaporated. The residue was added to saturated aqueous  $NaHCO_3$  and extracted three times with AcOEt. The AcOEt layers were combined, washed with brine, dried over anhydrous  $MgSO_4$ , and evaporated. The residue was purified by flash column chromatography on silica gel with a 50:1 mixture of  $CHCl_3$  and MeOH to give the pure **11** (879 mg, 99%) as a white powder. Mp 40-41 °C;  $[\alpha]_D^{20} = +4.6^\circ$  (c 0.50,  $CHCl_3$ );  $^1H$  NMR (400 MHz,  $CDCl_3$ ):  $\delta$  = 1.55 (brs, 2H), 2.07-2.13 (m, 2H), 2.25-2.39 (m, 2H), 2.54 (dd,  $J$  = 7.7, 13.5 Hz, 1H), 2.73 (dd,  $J$  = 5.3, 13.5 Hz, 1H), 3.11-3.17 (m, 1H), 3.20 (dd,  $J$  = 6.8, 11.6 Hz, 1H), 3.38 (dd,  $J$  = 3.9, 11.6 Hz, 1H), 4.03 (t,  $J$  = 5.8 Hz, 2H), 6.85 (d,  $J$  = 8.7 Hz, 2H), 7.11 (d,  $J$  = 8.7 Hz, 2H);  $^{13}C$  NMR (125 MHz,  $CDCl_3$ ):  $\delta$  = 20.6, 27.9 (t,  $^2J_{C-F}$  = 21.0 Hz), 40.5, 52.5, 57.4, 66.3, 114.6, 130.2, 130.5, 157.3; Anal. Calcd for  $C_{20}H_{17}F_{17}N_4O$ : C, 36.82; H, 2.63; N, 8.59. Found: C, 36.64; H, 2.53; N, 8.34.

### 2-4. Compound 12

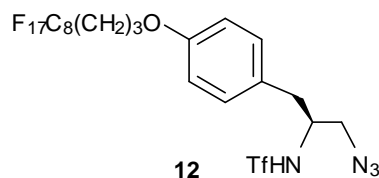

To a solution of **11** (820 mg, 1.26 mmol) in dry  $CH_2Cl_2$  (13 mL) was added triethylamine (700  $\mu$ L, 5.03 mmol) at room temperature under an argon atmosphere. After stirring for 5 min, trifluoromethanesulfonic anhydride (317  $\mu$ L, 1.89 mmol) was added to the reaction mixture at 0 °C. After stirring for 1 h at 0 °C, the reaction mixture was additionally stirred for 7 h at room temperature. The reaction mixture was added to water and extracted three times with AcOEt. The AcOEt layers were combined, washed with brine, dried over anhydrous  $MgSO_4$ , and evaporated. The residue was purified by flash column chromatography on silica gel with  $CHCl_3$  to give pure **12** (961 mg, 97%) as a white powder. Mp 61-62 °C;  $[\alpha]_D^{16} = +2.0^\circ$  (c 1.00,  $CHCl_3$ );  $^1H$  NMR (500 MHz,  $CDCl_3$ ):  $\delta$  = 2.08-2.13 (m, 2H), 2.26-2.37 (m, 2H), 2.86 (dd,  $J$  = 8.6, 13.8 Hz, 1H), 2.94 (dd,  $J$  = 5.7, 13.8 Hz, 1H), 3.41 (dd,  $J$  = 3.4, 12.6 Hz, 1H), 3.50 (dd,  $J$  = 4.6, 12.6 Hz, 1H), 3.85 (brs, 1H), 4.03 (t,  $J$  = 5.7 Hz, 2H), 4.98 (brs, 1H), 6.87 (d,  $J$  = 8.6 Hz, 2H), 7.10 (d,  $J$  = 8.6 Hz, 2H);  $^{13}C$  NMR (125 MHz,  $CDCl_3$ ):  $\delta$  = 20.5, 27.9 (t,  $^2J_{C-F}$  = 21.0 Hz), 38.1, 53.2, 55.9, 66.3, 115.0, 127.5, 130.5, 158.0; Anal. Calcd for  $C_{21}H_{16}F_{20}N_4O_3S$ : C, 32.15; H, 2.06; N, 7.14. Found: C, 32.11; H, 2.10; N, 7.07.

## 2-5. Organocatalyst **4**

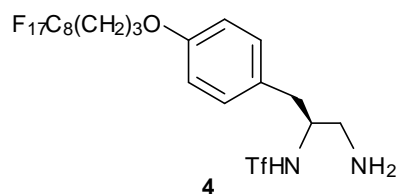

To a solution of **12** (402 mg, 0.513 mmol) in THF (30 mL)-H<sub>2</sub>O (10 mL) was added triphenylphosphine (161 mg, 0.615 mmol) at room temperature. After stirring for 22 h at 70 °C, the reaction mixture was evaporated. The residue was added to water and extracted three times with AcOEt. The AcOEt layers were combined, washed with brine, dried over anhydrous MgSO<sub>4</sub>, and evaporated. The residue was purified by flash column chromatography on silica gel with a 9:1:0.08 mixture of CHCl<sub>3</sub>, MeOH, and H<sub>2</sub>O to give the pure **4** (265 mg, 68%). White powder; mp 188-190 °C; [ $\alpha$ ]<sub>D</sub><sup>20</sup> = -8.3° (c 0.50, MeOH); <sup>1</sup>H NMR (400 MHz, CD<sub>3</sub>OD):  $\delta$  = 2.01-2.09 (m, 2H), 2.31-2.44 (m, 2H), 2.54-2.60 (m, 2H), 2.79 (dd,  $J$  = 3.4, 12.6 Hz, 1H), 2.89 (dd,  $J$  = 5.3, 14.0 Hz, 1H), 3.50-3.62 (m, 1H), 4.05 (t,  $J$  = 6.3 Hz, 2H), 6.87 (d,  $J$  = 8.7 Hz, 2H), 7.12 (d,  $J$  = 8.7 Hz, 2H); <sup>13</sup>C NMR (125 MHz, CD<sub>3</sub>OD):  $\delta$  = 21.7, 28.7 (t, <sup>2</sup> $J_{C-F}$  = 21.5 Hz), 42.2, 45.7, 57.4, 67.4, 115.7, 131.5, 131.7, 158.9; Anal. Calcd for C<sub>21</sub>H<sub>18</sub>F<sub>20</sub>N<sub>2</sub>O<sub>3</sub>S: C, 33.26; H, 2.39; N, 3.69. Found: C, 33.42; H, 2.45; N, 3.54.

### 3. Procedure for recycling and reusing fluorous organocatalyst **4** (Table 3):

A typical procedure of the aldol condensation using **4** and **5a** is as follows: To a colorless suspension of **5a** (90.7 mg, 0.60 mmol) and the organocatalyst **4** (22.7 mg, 0.030 mmol) in 1.2 mL of brine was added cyclohexanone (311  $\mu$ L, 3.00 mmol) at room temperature. The reaction mixture was stirred at room temperature for 48h. The reaction mixture was chromatographed on fluorous silica gel with 70% methanol (MeOH-H<sub>2</sub>O = 7:3). Next, the fluorous silica gel was eluted with methanol, and the methanol fraction was evaporated to recover the fluorous organocatalyst **4** (22.7 mg, 100%). The 70% methanol fractions were evaporated to a one-third to original volume. The residue was extracted three times with AcOEt. The AcOEt layers were combined, washed with brine, dried over anhydrous MgSO<sub>4</sub>, and evaporated. The residue was purified by flash column chromatography on silica gel with a 2:1 mixture of hexane and AcOEt to afford the pure **7a** (122 mg, 82%) as a colorless powder.

All the aldol products in the paper are known compounds that exhibited spectroscopic data identical to those reported in the literature.<sup>2-5</sup>

### (2*R*,1'*S*)-2-[Hydroxy(4-nitrophenyl)methyl]cyclohexan-1-one (**7a**)<sup>2,3,5</sup>:

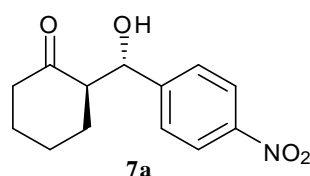

Enantiomeric excess was determined by HPLC with Chiralpak AS-H column (hexane/2-propanol = 80:20), flow rate = 1.0 mL/min;  $\lambda$  = 254nm;  $t_{\text{minor}}$  = 16.9 min,  $t_{\text{major}}$  = 19.1 min.

**(2*R*,1'*S*)-2-[Hydroxy(4-trifluoromethylphenyl)methyl]cyclohexan-1-one (7b)<sup>3</sup>:**

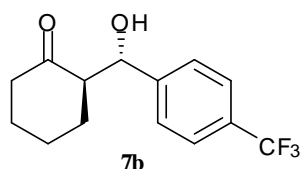

$[\alpha]_D^{20} = -19.2^\circ$  (c 1.00, CHCl<sub>3</sub>); 94% ee; Enantiomeric excess was determined by HPLC with Chiralcel OD-H column (hexane/2-propanol = 80:20), flow rate = 0.5 mL/min;  $\lambda = 216$  nm;  $t_{\text{major}} = 10.0$  min,  $t_{\text{minor}} = 11.2$  min.

**(2*R*,1'*S*)-2-[Hydroxy(4-bromophenyl)methyl]cyclohexan-1-one (7c)<sup>2,3</sup>:**

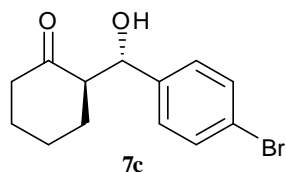

$[\alpha]_D^{24} = -19.9^\circ$  (c 0.96, CHCl<sub>3</sub>); 95% ee; Enantiomeric excess was determined by HPLC with Chiralpak AS-H column (hexane/2-propanol = 90:10), flow rate = 0.5 mL/min;  $\lambda = 217$  nm;  $t_{\text{minor}} = 28.0$  min,  $t_{\text{major}} = 29.3$  min.

**4-((*S*)-Hydroxy((*R*)-2-oxocyclohexyl)methyl)benzonitrile (7d)<sup>2</sup>:**

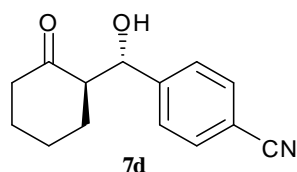

Enantiomeric excess was determined by HPLC with Chiralcel OD-H column (hexane/2-propanol = 70:30), flow rate = 0.5 mL/min;  $\lambda = 234$  nm;  $t_{\text{major}} = 12.9$  min,  $t_{\text{minor}} = 16.2$  min.

**(2*R*,1'*S*)-2-[Hydroxy(4-methoxyphenyl)methyl]cyclohexan-1-one (7e)<sup>2,3,5</sup>:**

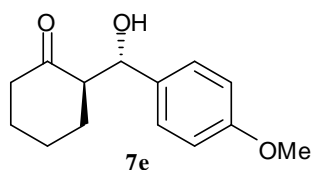

Enantiomeric excess was determined by HPLC with Chiralcel OD-H column (hexane/2-propanol = 90:10), flow rate = 0.5 mL/min;  $\lambda = 225$  nm;  $t_{\text{minor}} = 20.8$  min,  $t_{\text{major}} = 27.8$  min.

**(2*R*,1'*S*)-2-(Hydroxyphenylmethyl)cyclohexan-1-one (7f)<sup>2,3,5</sup>:**

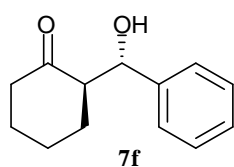

$[\alpha]_D^{20} = -20.8^\circ$  (c 1.00, CHCl<sub>3</sub>); 94% ee; Enantiomeric excess was determined by HPLC with Chiralcel OD-H column (hexane/2-propanol = 95:5), flow rate = 1.0 mL/min;  $\lambda = 210$  nm;  $t_{\text{minor}} = 11.5$  min,  $t_{\text{major}} =$

16.4 min.

**(2*R*,1'*S*)-2-[Hydroxy(2-nitrophenyl)methyl]cyclohexan-1-one (7g)<sup>2,5</sup>:**

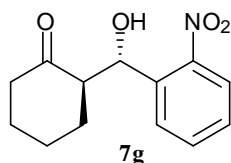

$[\alpha]_{\text{D}}^{17} = -14.9^{\circ}$  (c 1.00,  $\text{CHCl}_3$ ); 96% ee; Enantiomeric excess was determined by HPLC with Chiralcel OD-H column (hexane/2-propanol = 80:20), flow rate = 0.5 mL/min;  $\lambda = 250$  nm;  $t_{\text{minor}} = 13.9$  min,  $t_{\text{major}} = 15.4$  min.

**(2*R*,1'*S*)-2-[Hydroxy(3-nitrophenyl)methyl]cyclohexan-1-one (7h)<sup>2</sup>:**

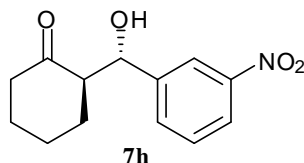

$[\alpha]_{\text{D}}^{24} = -24.2^{\circ}$  (c 1.07,  $\text{CHCl}_3$ ); 91% ee; Enantiomeric excess was determined by HPLC with Chiralcel OD-H column (hexane/2-propanol = 80:20), flow rate = 0.5 mL/min;  $\lambda = 254$  nm;  $t_{\text{minor}} = 14.9$  min,  $t_{\text{major}} = 18.4$  min.

**(2*R*,1'*S*)-2-[Hydroxy(3-methoxyphenyl)methyl]cyclohexan-1-one (7i)<sup>4</sup>:**

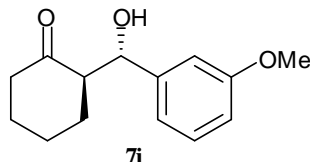

$[\alpha]_{\text{D}}^{22} = -6.6^{\circ}$  (c 1.00,  $\text{CHCl}_3$ ); 94% ee; Enantiomeric excess was determined by HPLC with Chiralpak AS column (hexane/2-propanol = 90:10), flow rate = 1.0 mL/min;  $\lambda = 220$  nm;  $t_{\text{minor}} = 13.7$  min,  $t_{\text{major}} = 17.2$  min.

**(2*R*,1'*S*)-2-[Hydroxy(2,6-dichlorophenyl)methyl]cyclohexan-1-one (7j)<sup>5</sup>:**

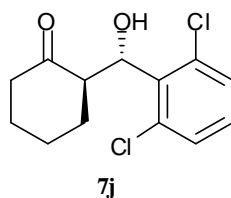

$[\alpha]_{\text{D}}^{24} = +32.9^{\circ}$  (c 0.99,  $\text{CHCl}_3$ ); 94% ee; Enantiomeric excess was determined by HPLC with Chiralcel OJ-H column (hexane/2-propanol = 95:5), flow rate = 1.0 mL/min;  $\lambda = 210$  nm;  $t_{\text{major}} = 9.5$  min,  $t_{\text{minor}} = 11.0$  min.

**(2*R*,1'*S*)-2-[Hydroxy(2,3,4,5,6-pentafluorophenyl)methyl]cyclohexan-1-one (7k)<sup>5</sup>:**

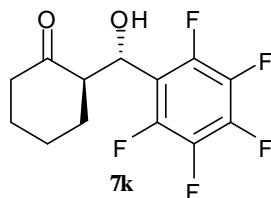

$[\alpha]_D^{18} = +7.2^\circ$  (c 1.00, CHCl<sub>3</sub>); 84% ee; Enantiomeric excess was determined by HPLC with Chiralpak AS-H column (hexane/2-propanol = 90:10), flow rate = 0.5 mL/min;  $\lambda = 210$  nm;  $t_{\text{minor}} = 14.4$  min,  $t_{\text{major}} = 18.2$  min.

**(2*R*,1'*S*)-2-[Hydroxy(4-nitrophenyl)methyl]cycloheptan-1-one (7l)<sup>2,5</sup>:**

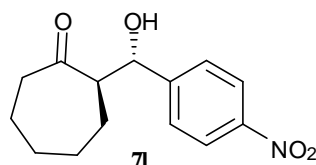

$[\alpha]_D^{26} = +10.7^\circ$  (c 1.08, CHCl<sub>3</sub>); 73% ee; Enantiomeric excess was determined by HPLC with Chiralpak AD-H column (hexane/2-propanol = 90:10), flow rate = 1.0 mL/min;  $\lambda = 254$  nm;  $t_{\text{major}} = 20.0$  min,  $t_{\text{minor}} = 47.9$  min.

**(2*R*,1'*S*)-2-[Hydroxy(4-nitrophenyl)methyl]cyclopentan-1-one (7m)<sup>2,5</sup>:**

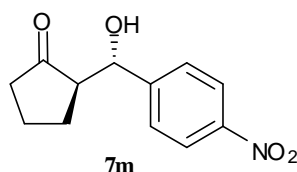

Enantiomeric excess was determined by HPLC with Chiralpak AD-H column (hexane/2-propanol = 95:5), flow rate = 1.0 mL/min;  $\lambda = 265$  nm;  $t_{\text{major}} = 45.8$  min,  $t_{\text{minor}} = 48.5$  min.

**(4*S*)-4-Hydroxy-*p*-nitrophenylbutan-2-one (7n)<sup>2,3,5</sup>:**

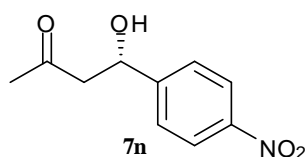

$[\alpha]_D^{26} = -42.62^\circ$  (c 1.00, CHCl<sub>3</sub>); 70% ee; Enantiomeric excess was determined by HPLC with Chiralcel OJ column (hexane/2-propanol = 90:10), flow rate = 1.0 mL/min;  $\lambda = 266$  nm;  $t_{\text{minor}} = 32.0$  min,  $t_{\text{major}} = 36.0$  min.

#### 4. References

- 1) T. Miura, K. Itoh, Y. Yasaku, N. Koyata, Y. Murakami and N. Imai, *Tetrahedron Lett.*, 2008, **49**, 5813.
- 2) N. Mase, Y. Nakai, N. Ohara, H. Yoda, K. Takabe, F. Tanaka and C. F. Barbas, *J. Am. Chem. Soc.*, 2006, **128**, 734.
- 3) D. Font, C. Jimeno and M. A. Pericàs, *Org. Lett.*, 2006, **8**, 4653.
- 4) Z. Jiang, Z. Liang, X. Wu and Y. Lu, *Chem. Commun.*, 2006, 2801.
- 5) H. Tang and R. G. Carter, *Org. Lett.*, 2008, **10**, 4649.



## 5. NMR data

KI-313(149)

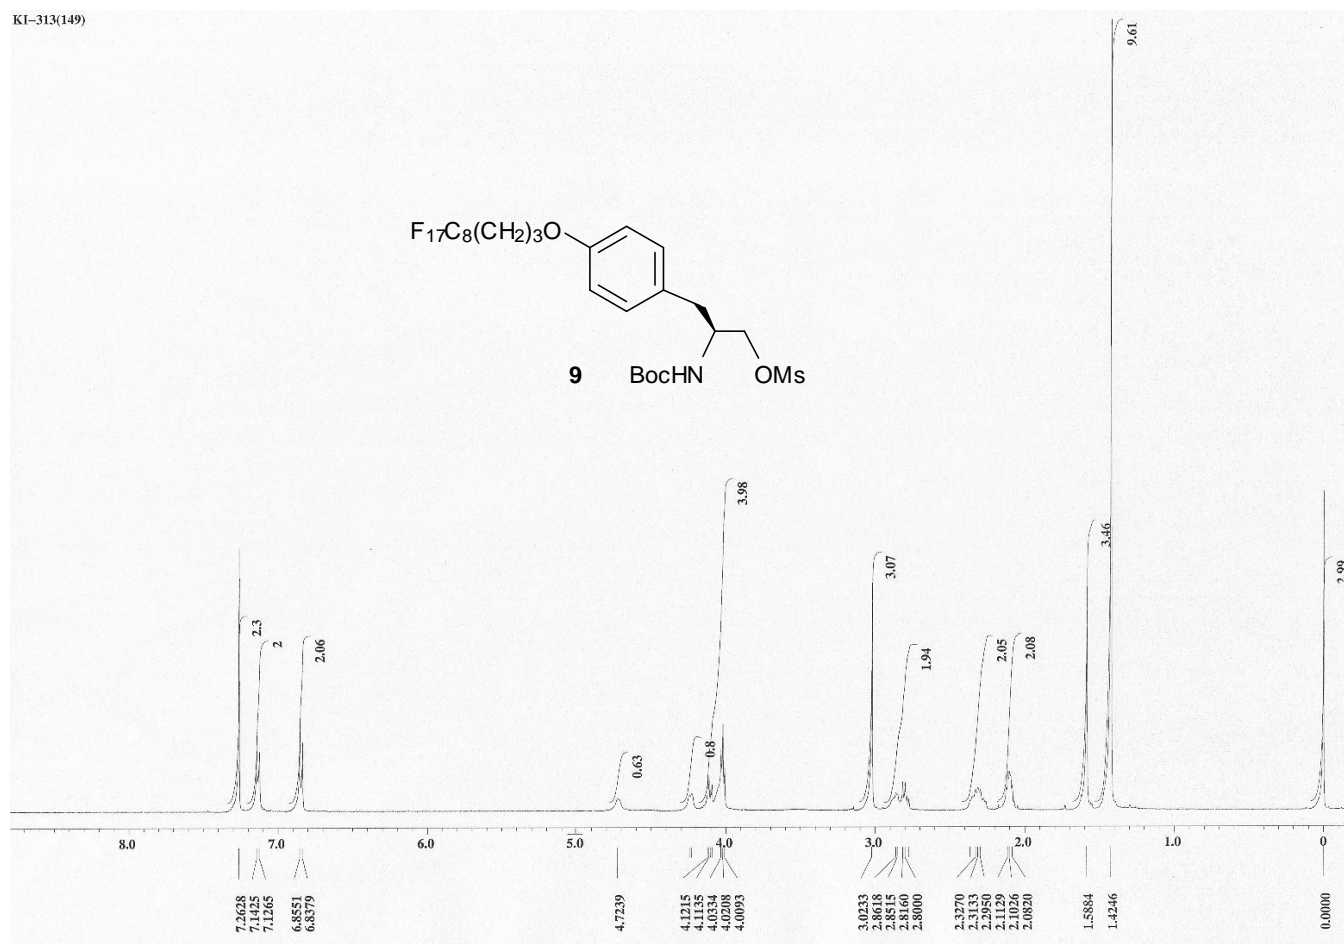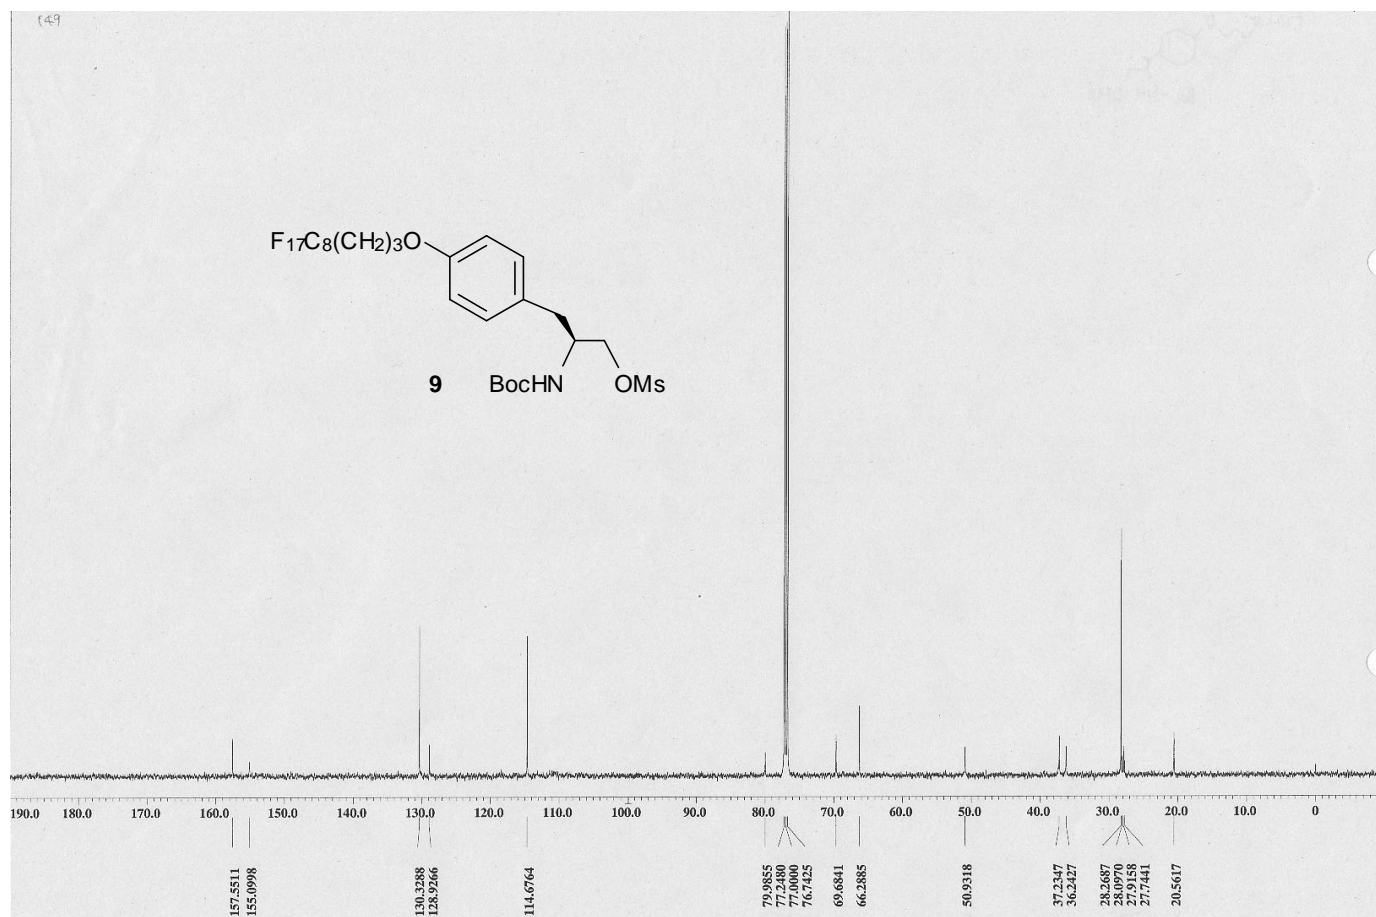

K1-314(150)

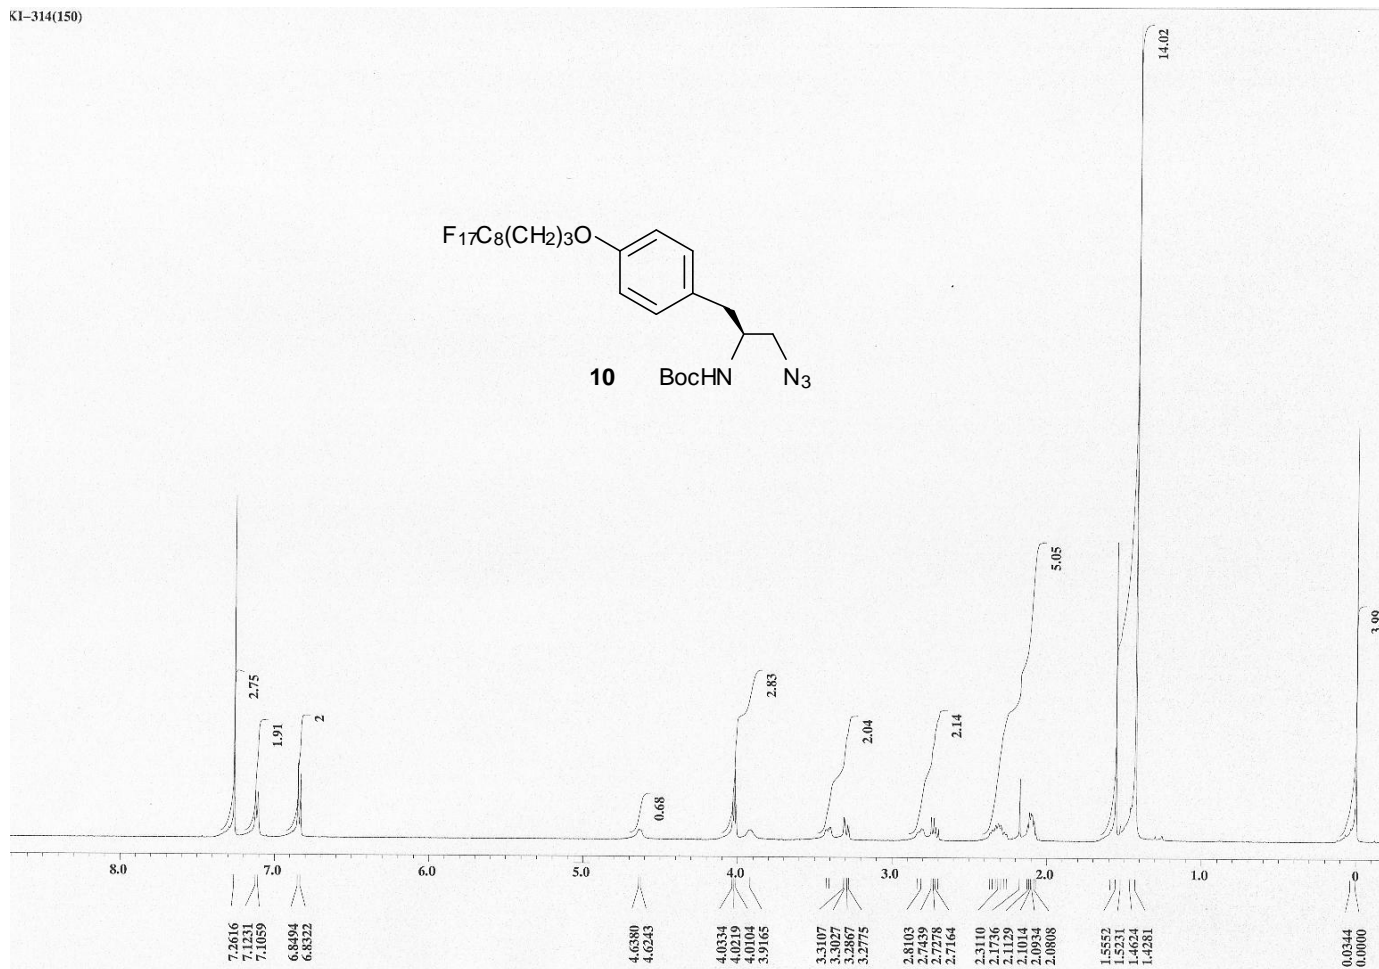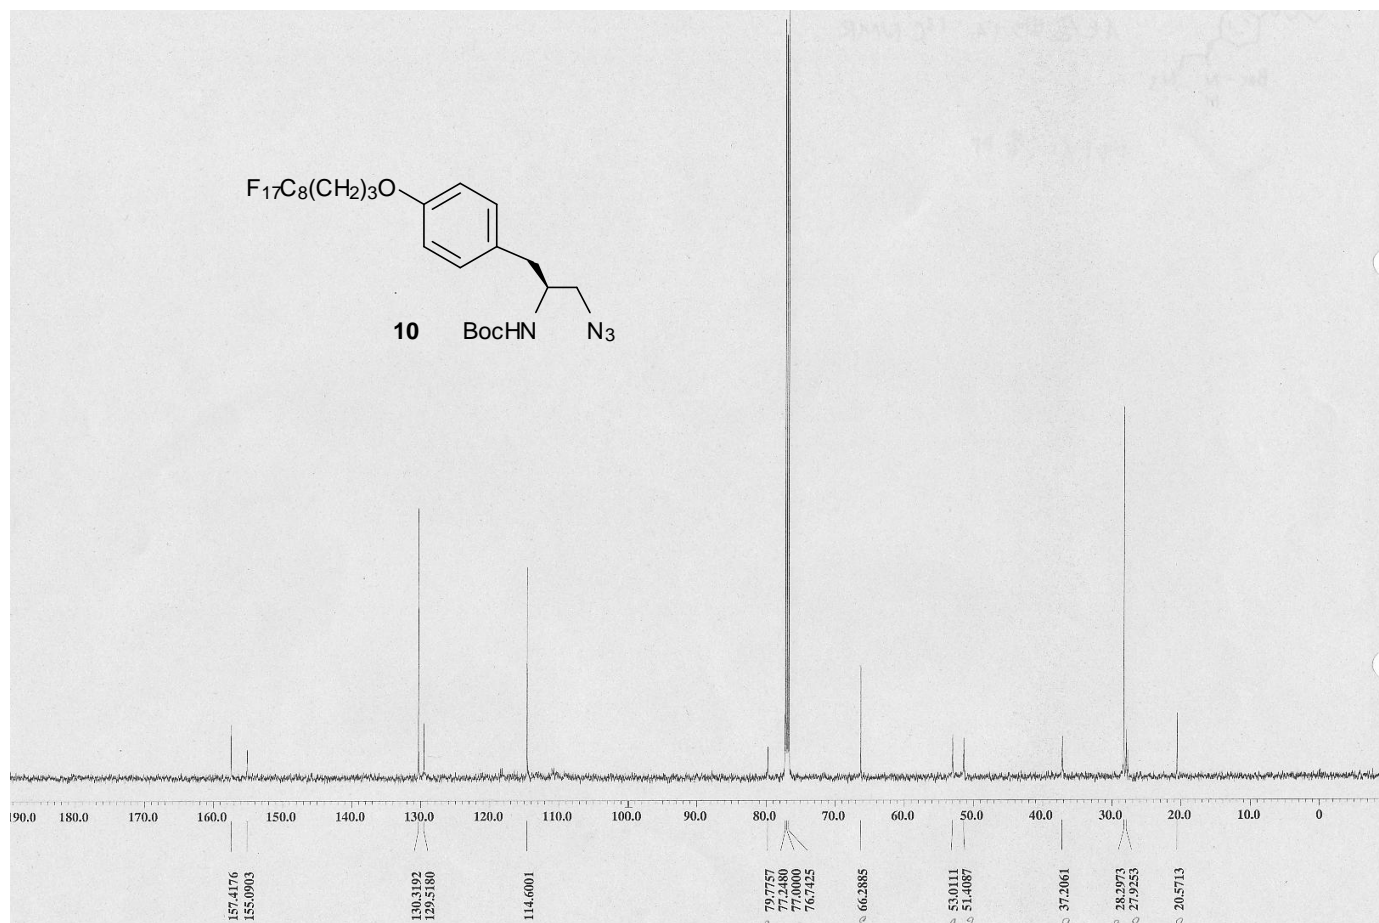



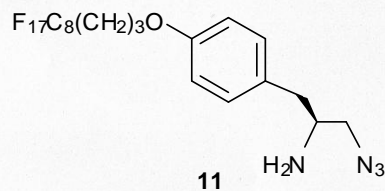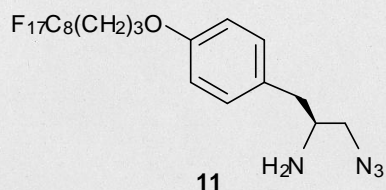

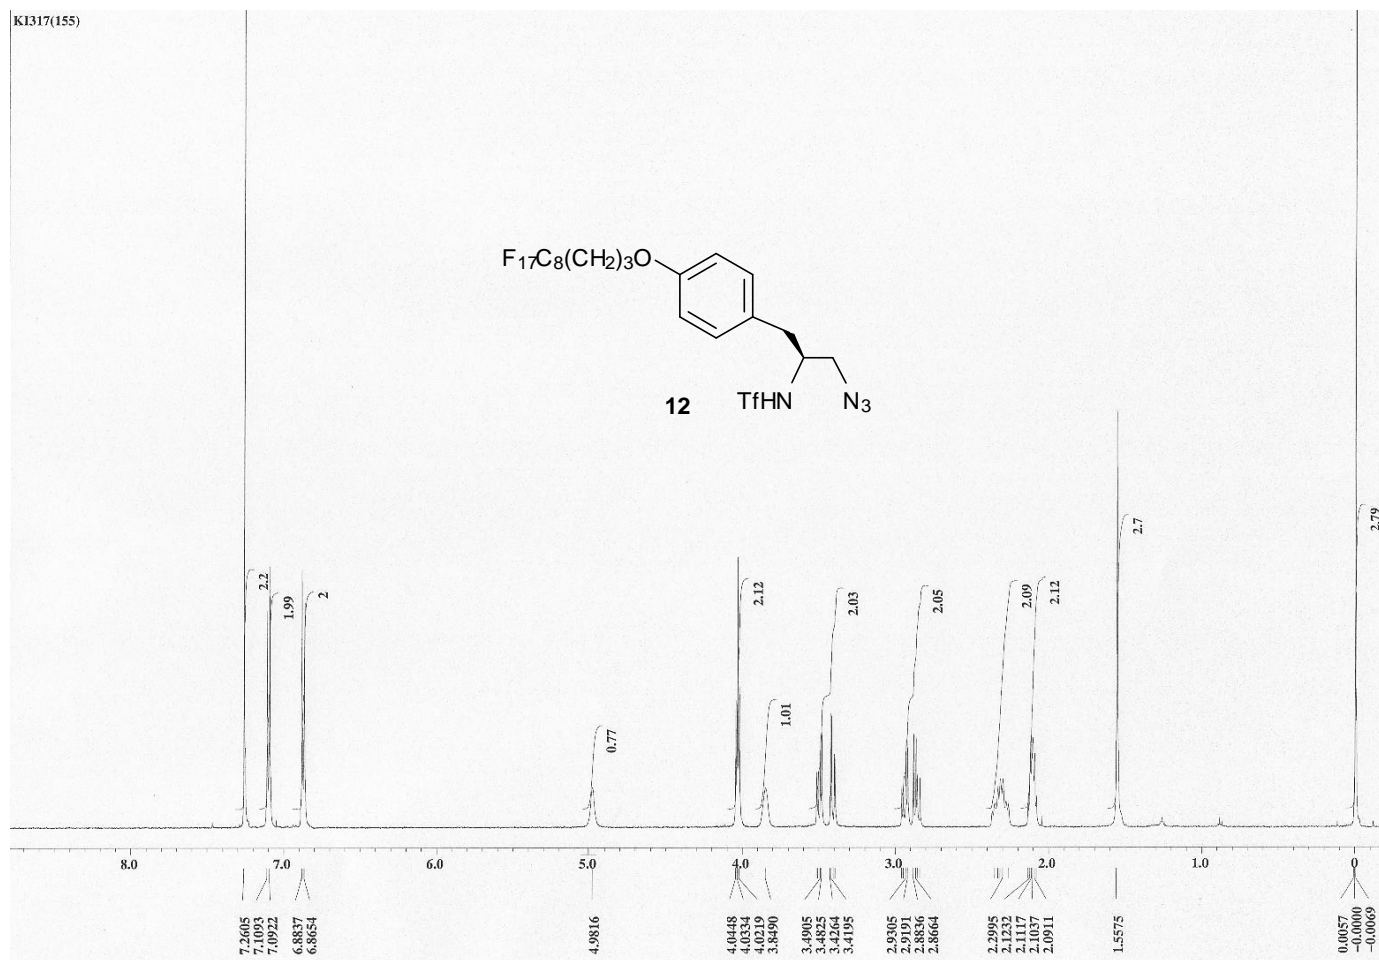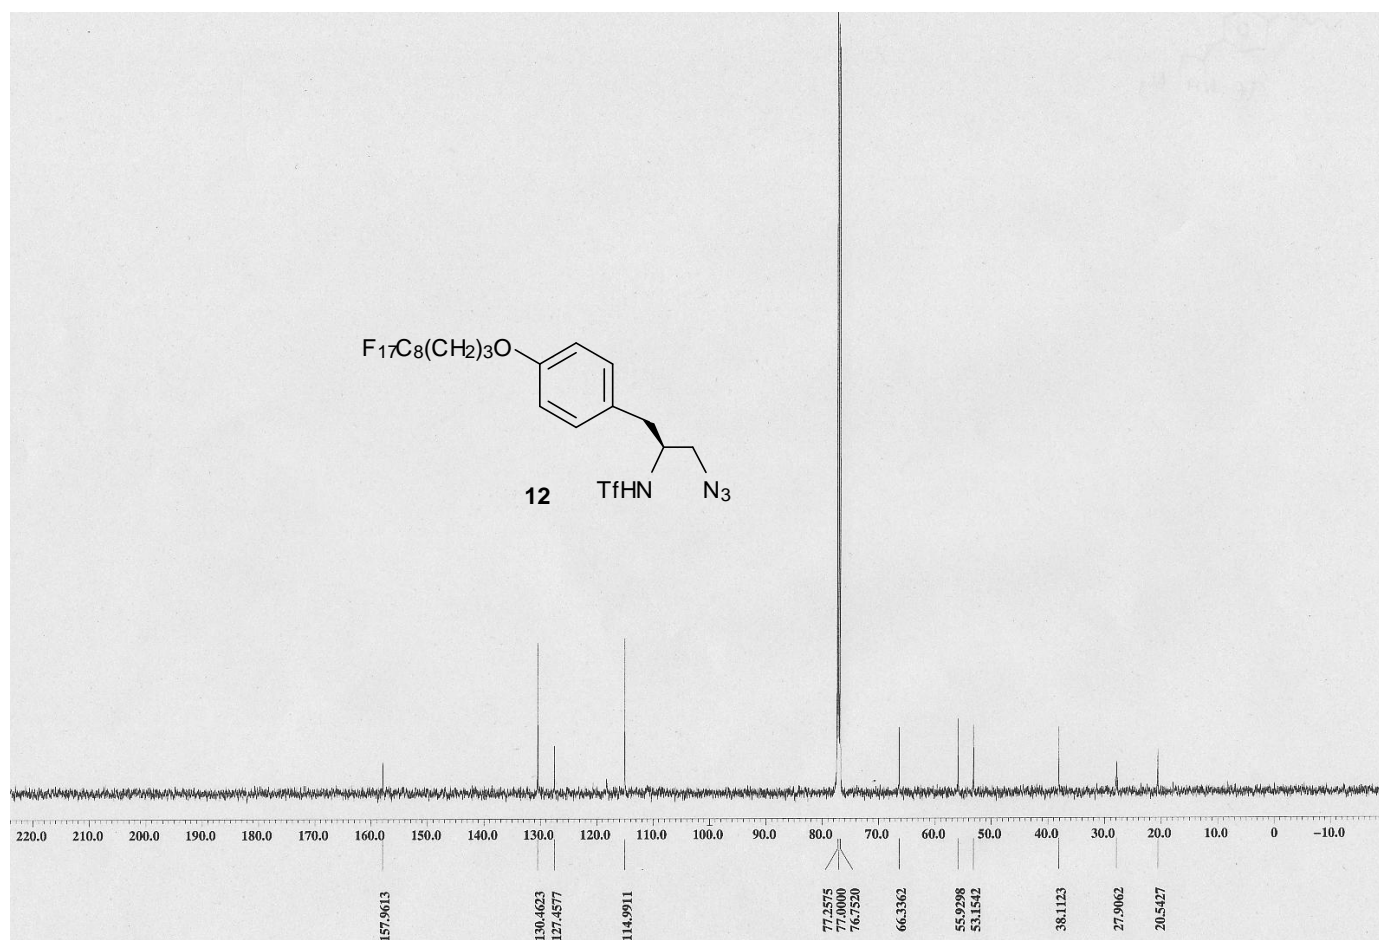



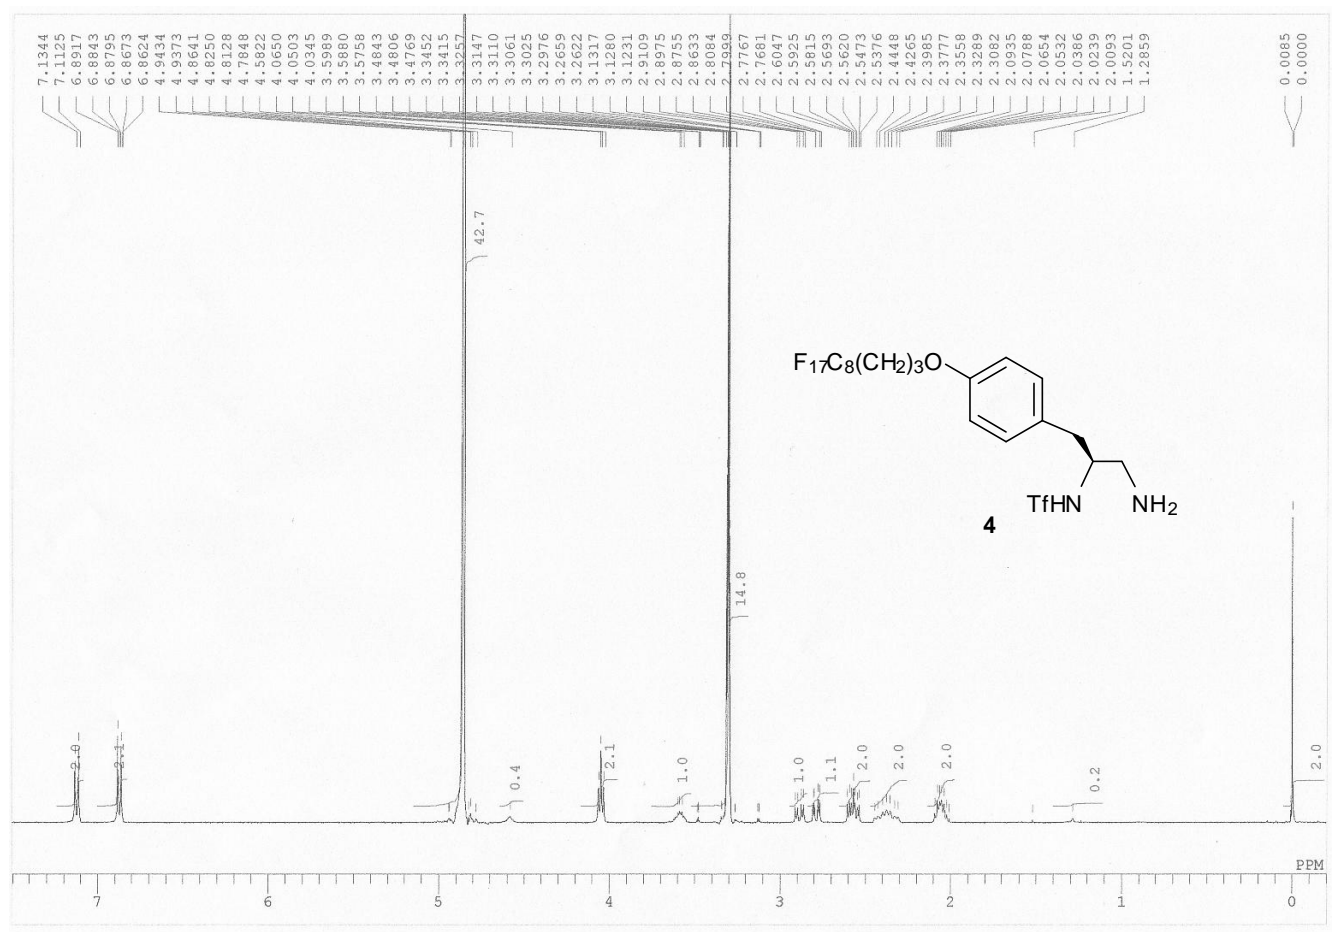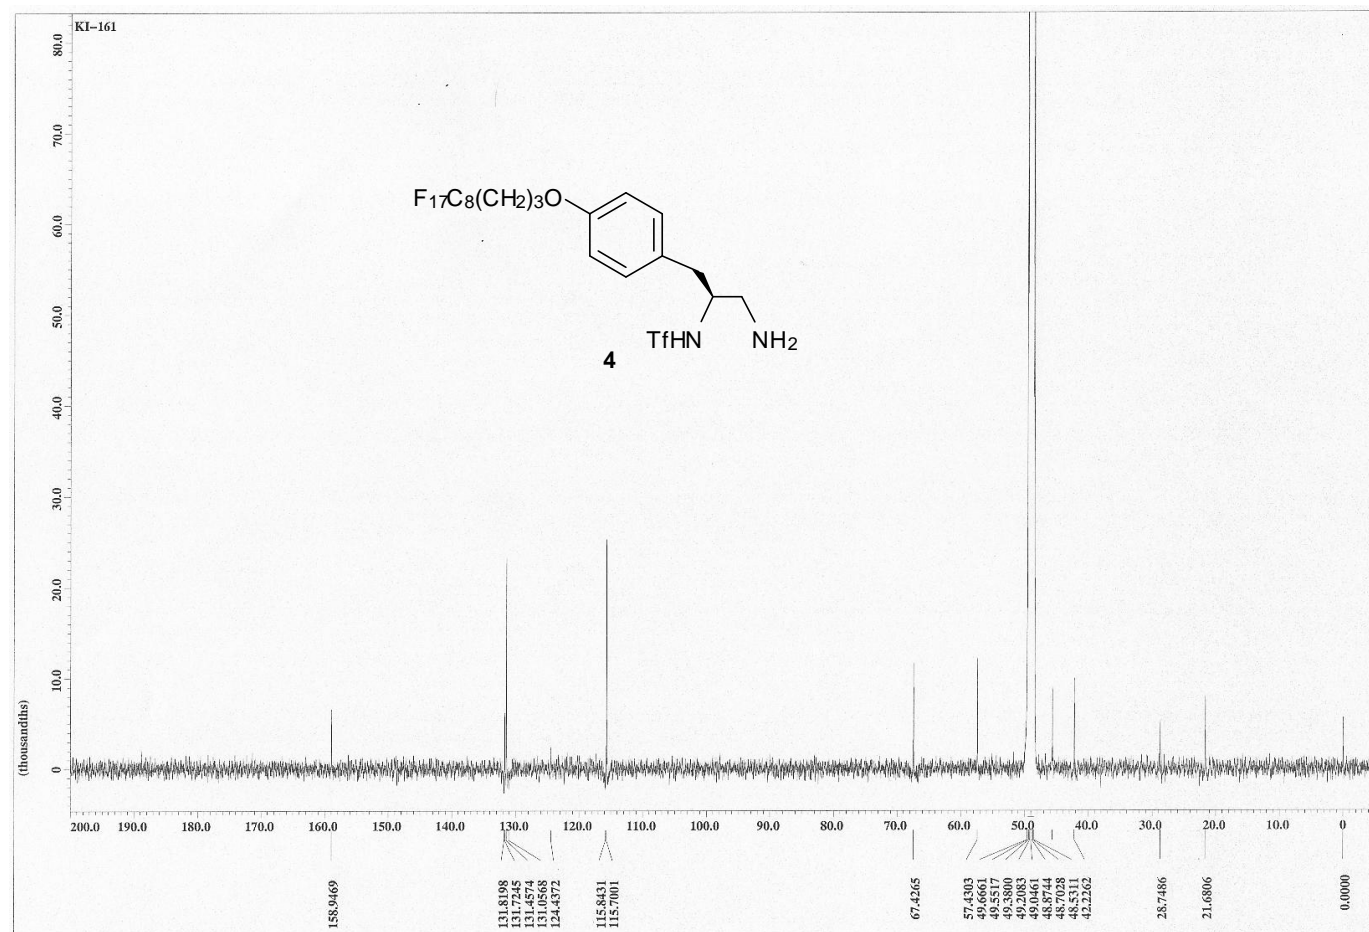

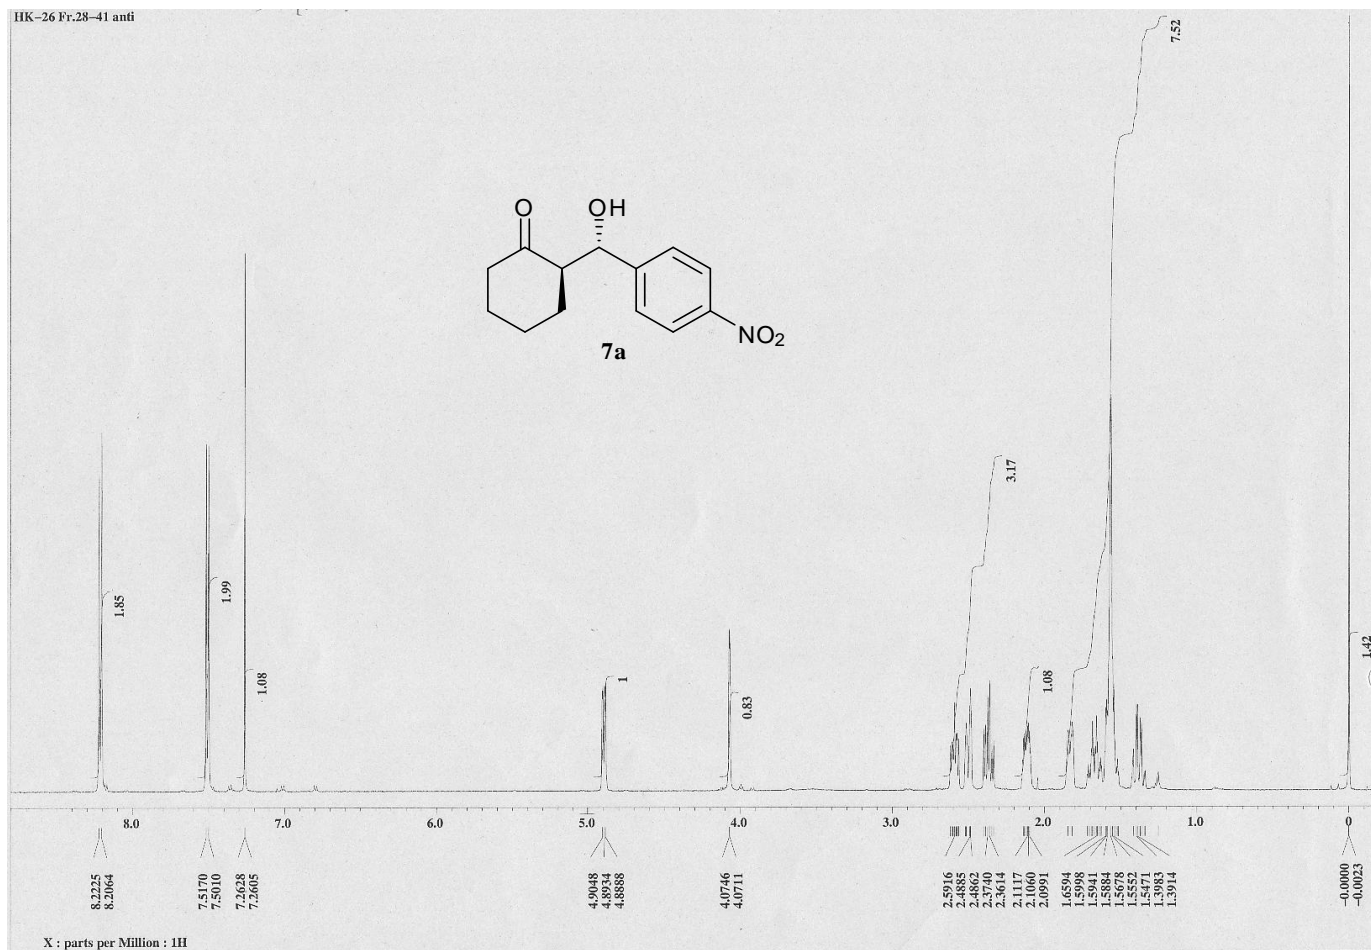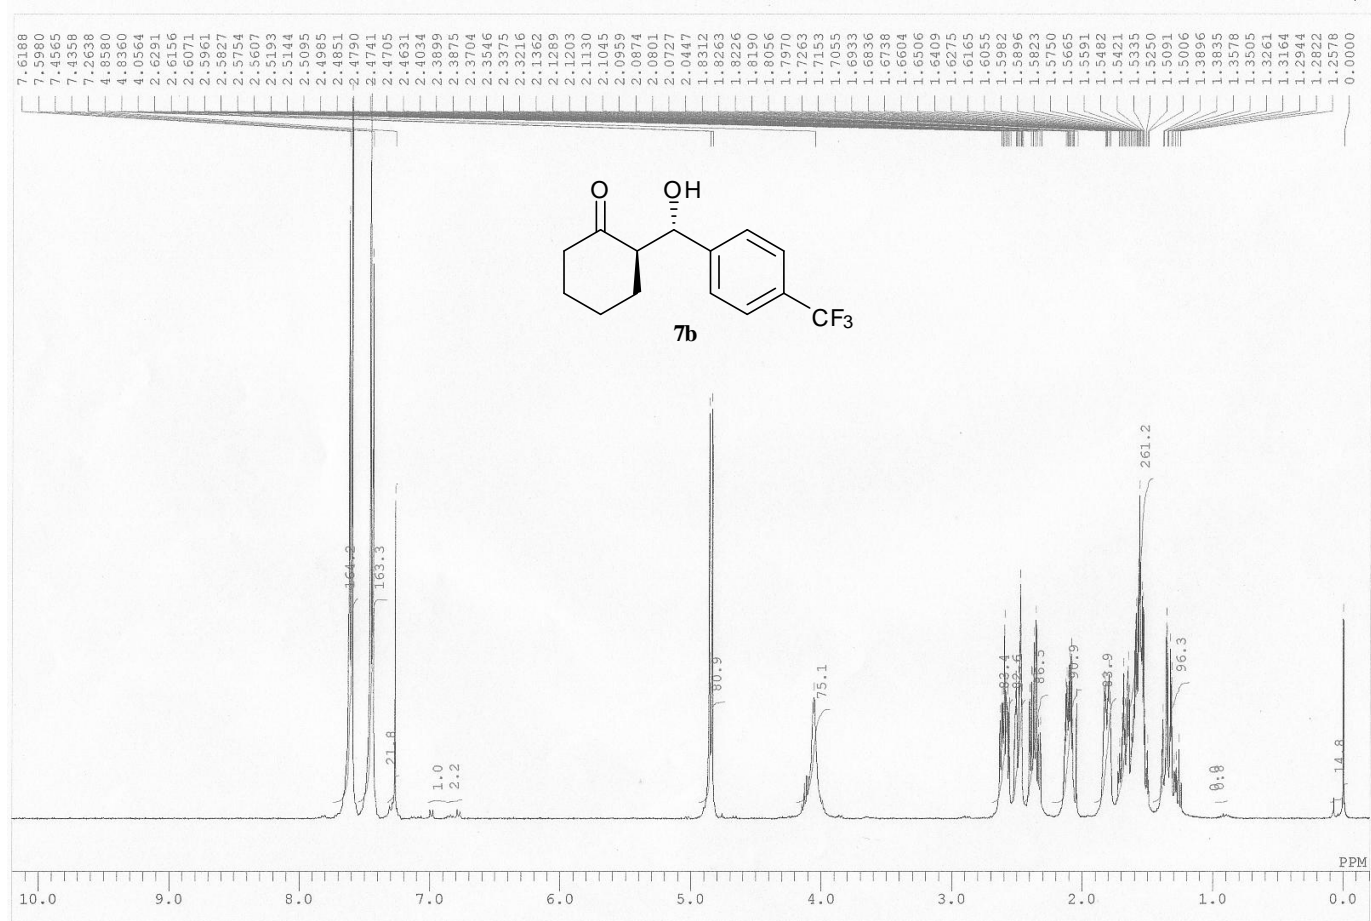



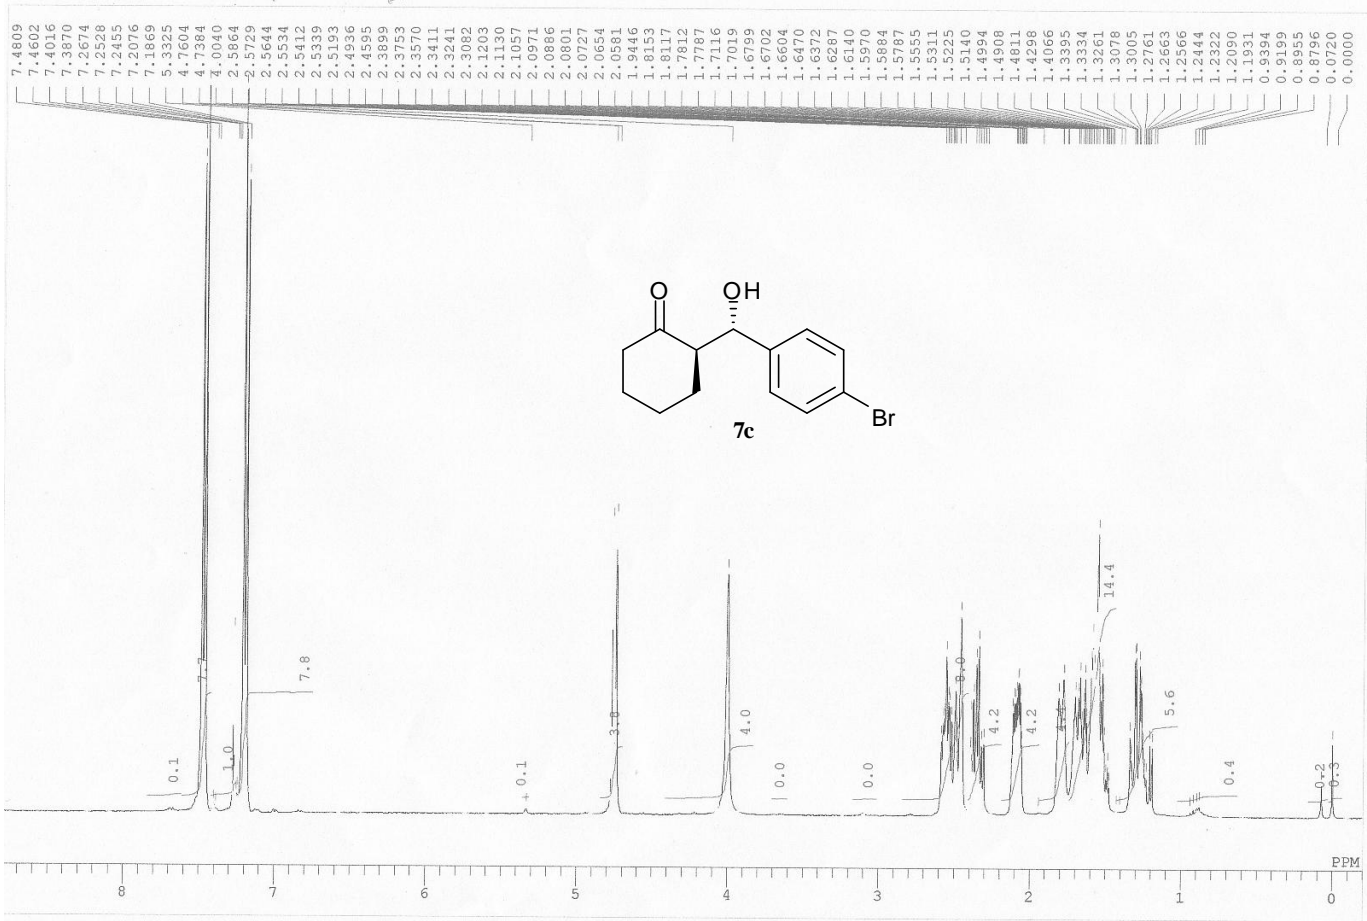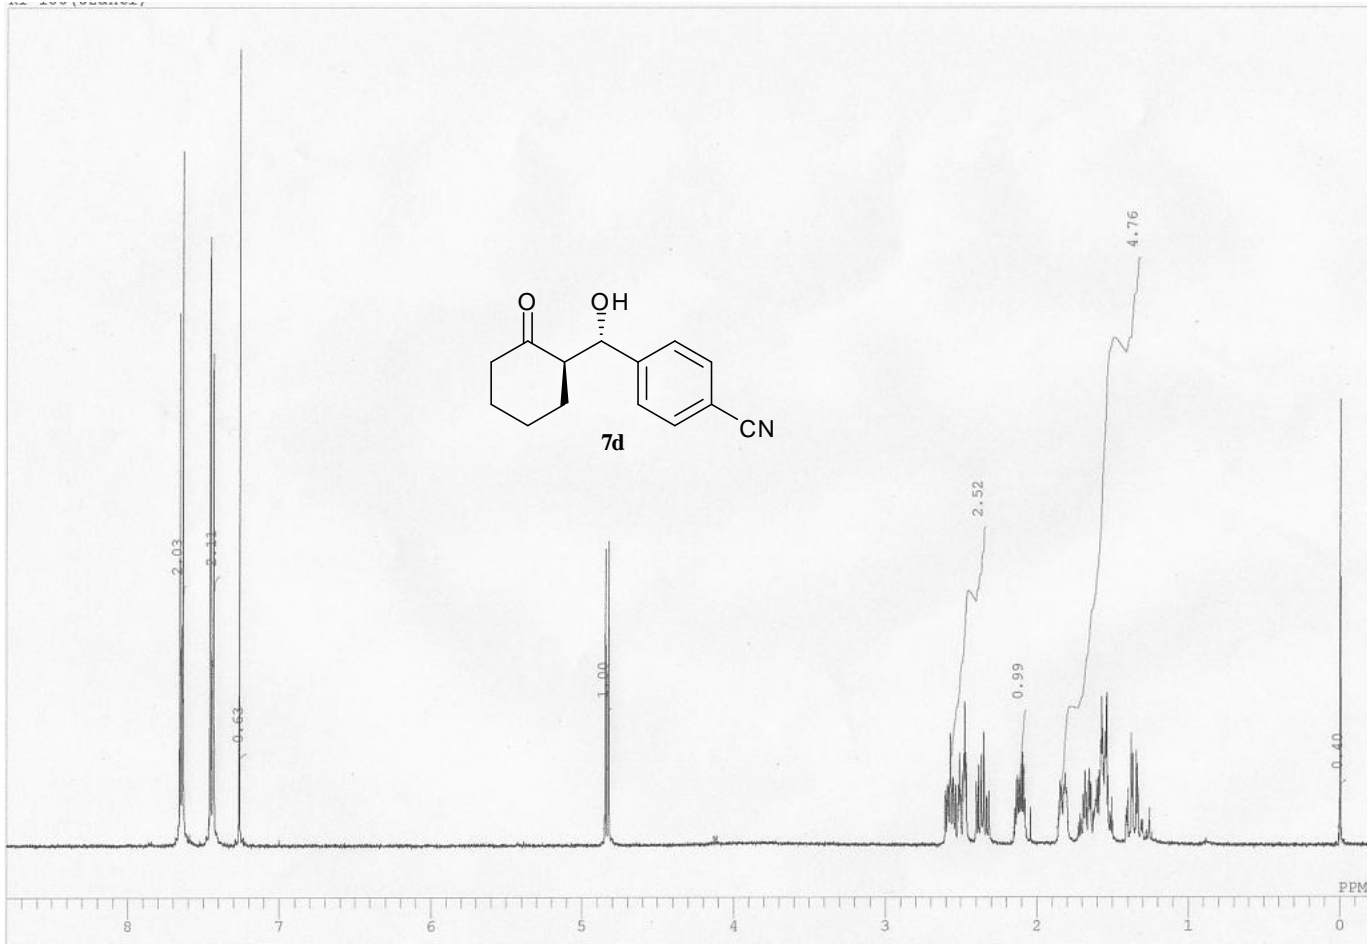

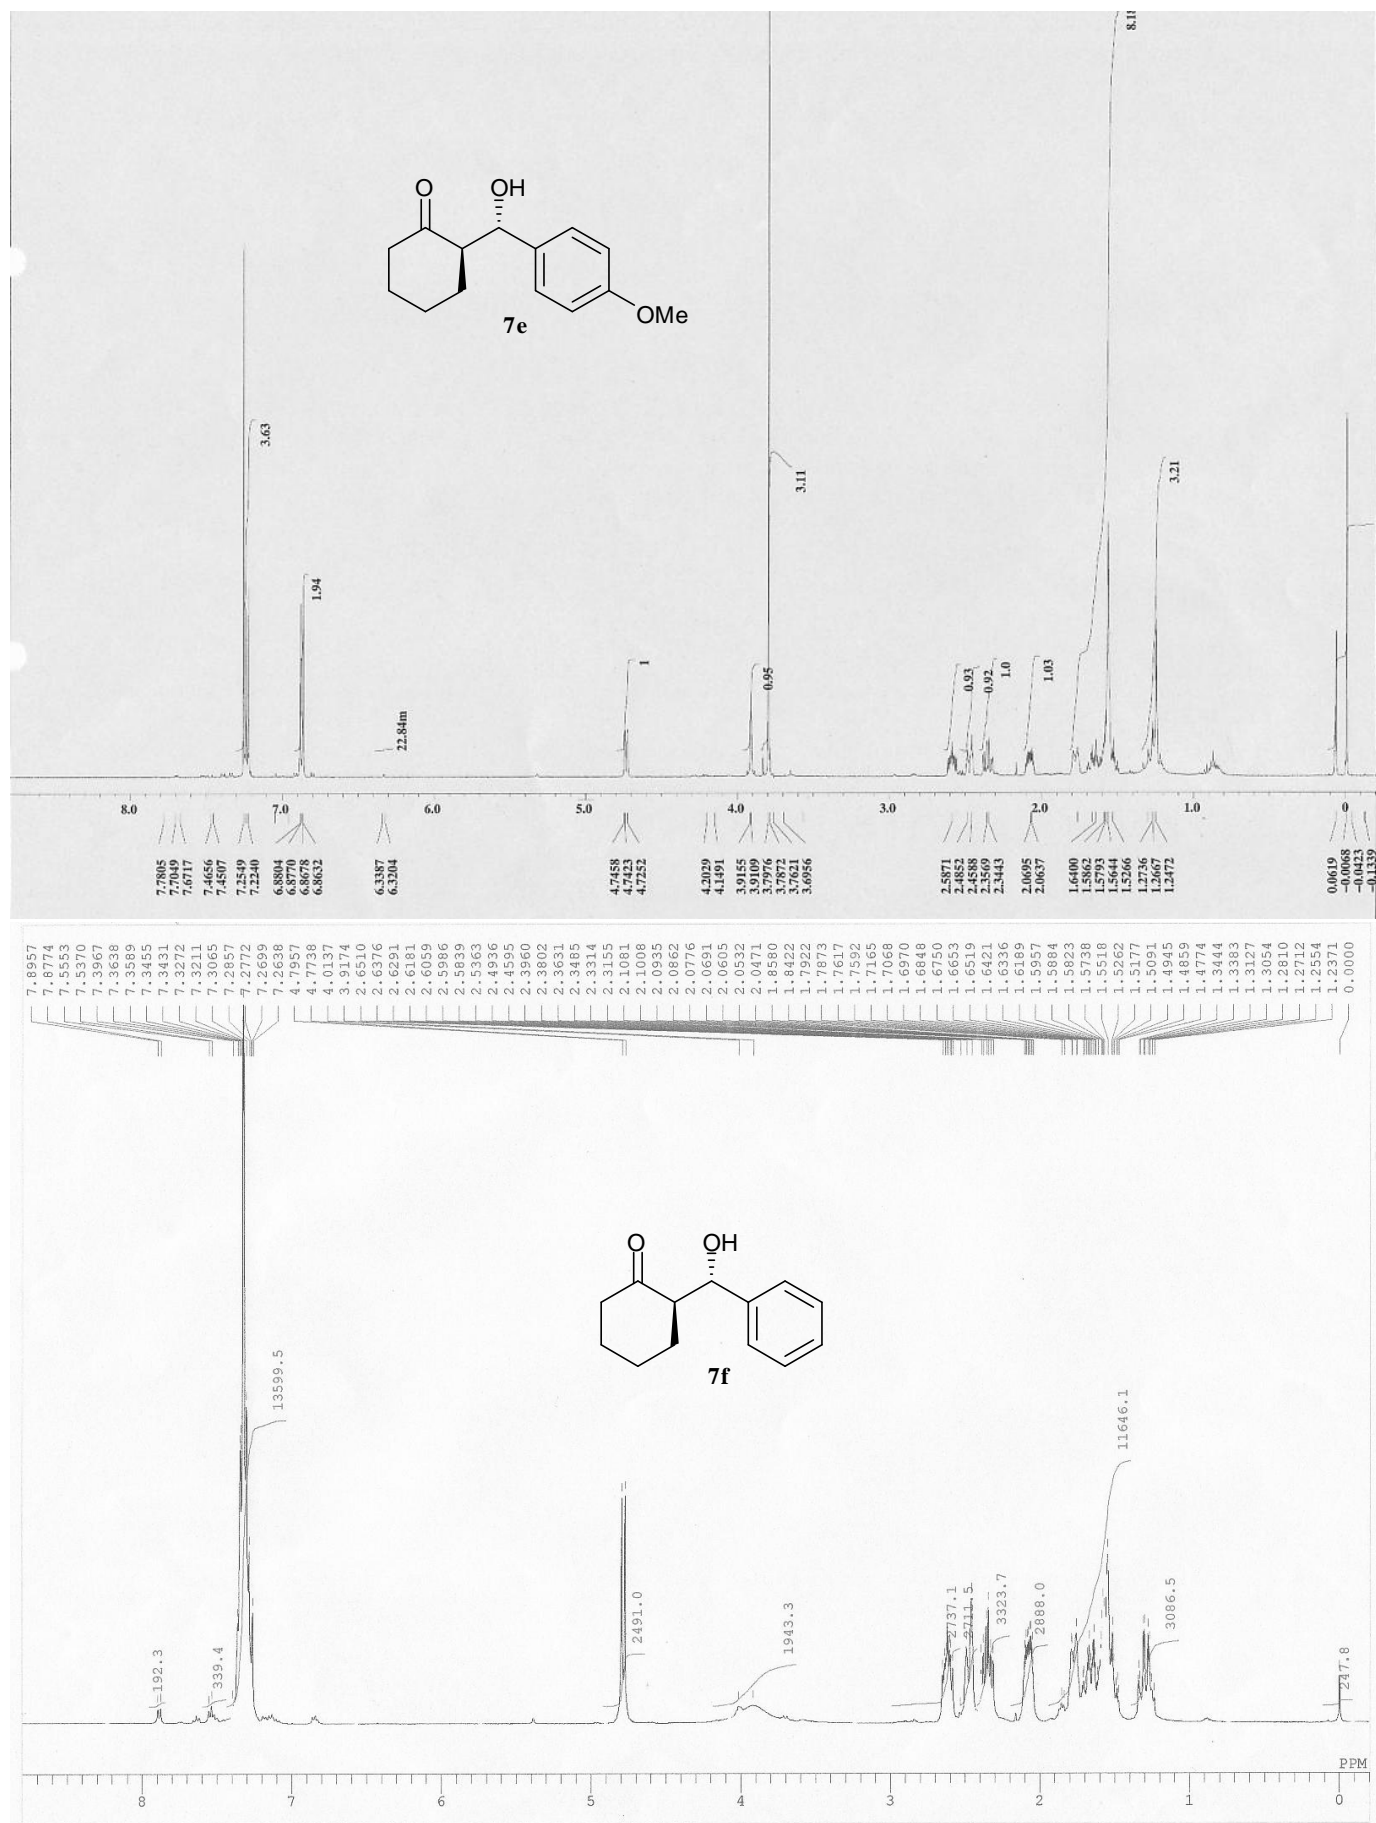



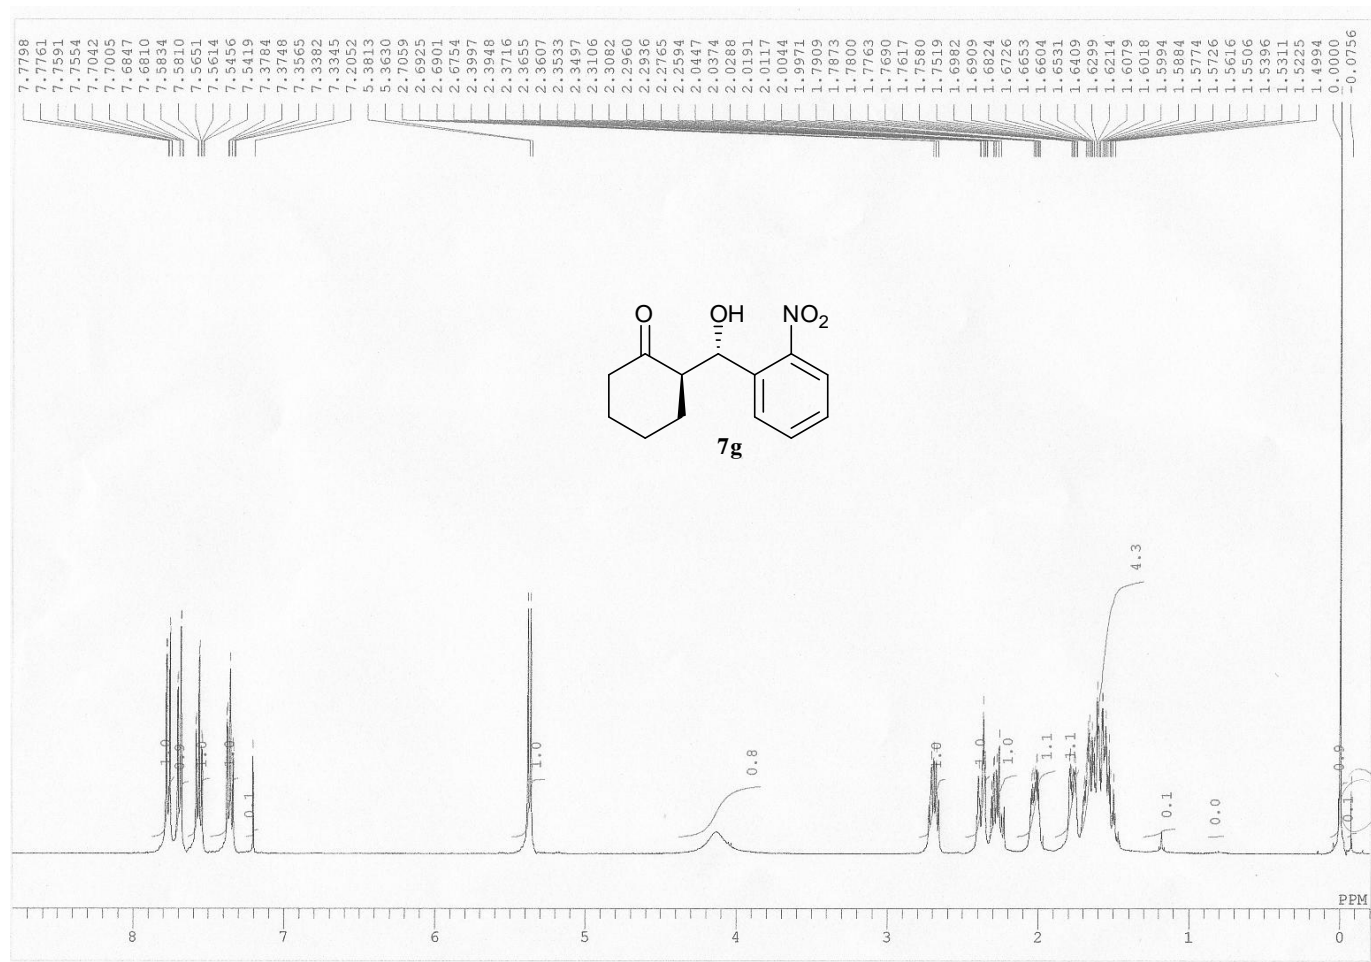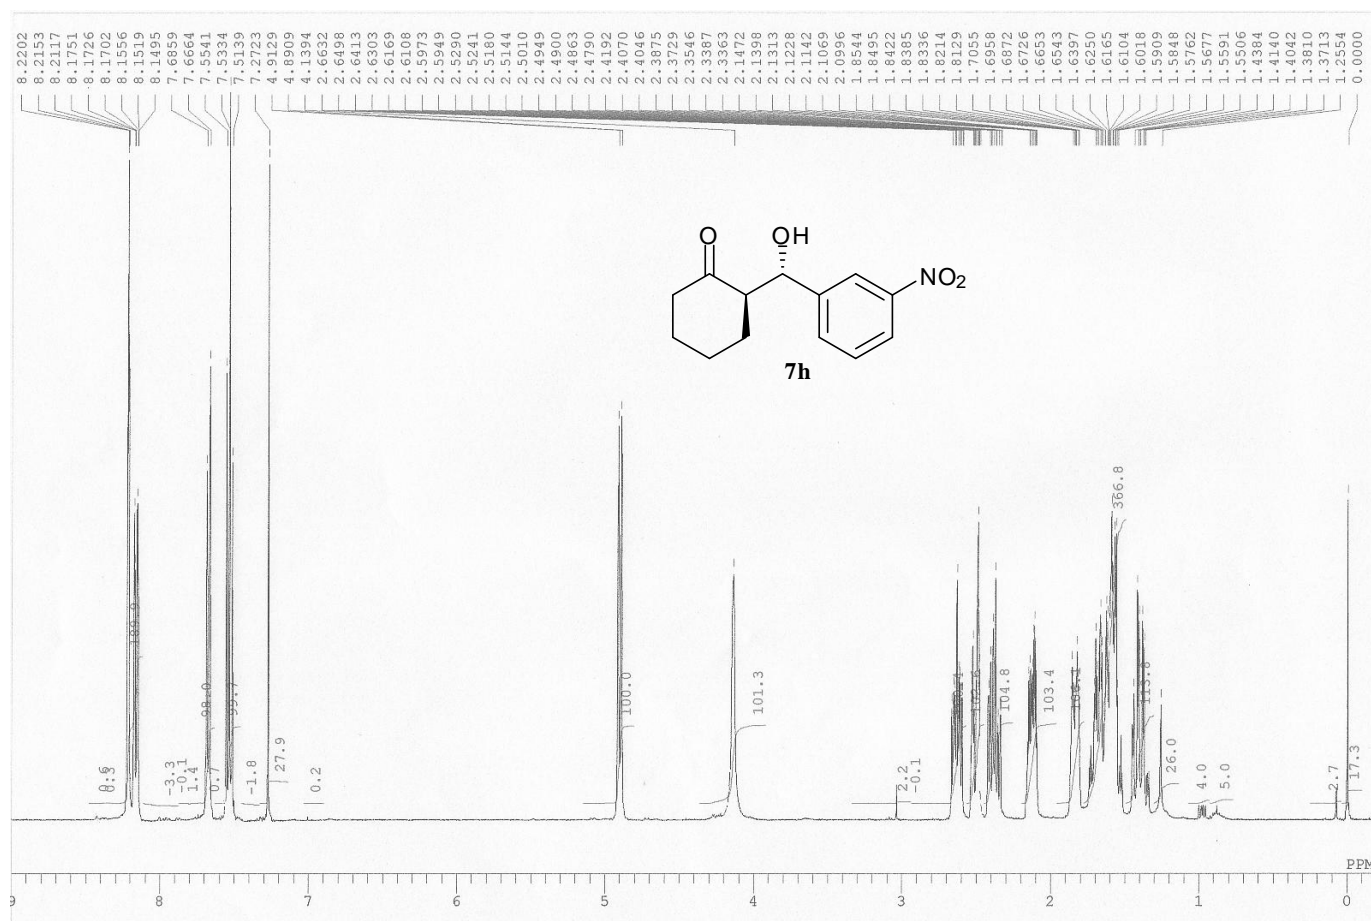

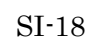



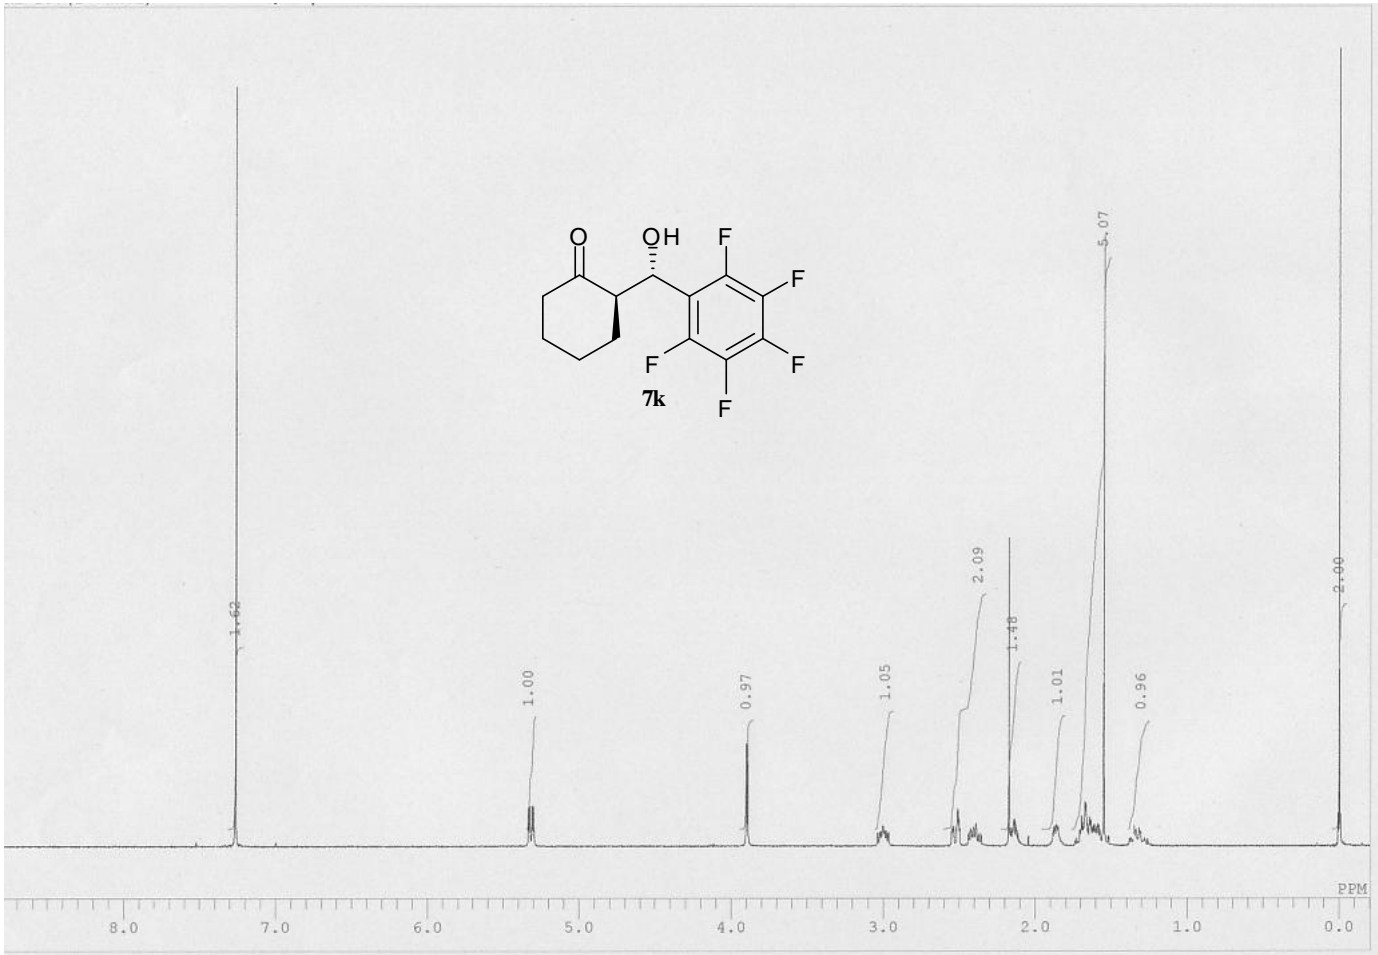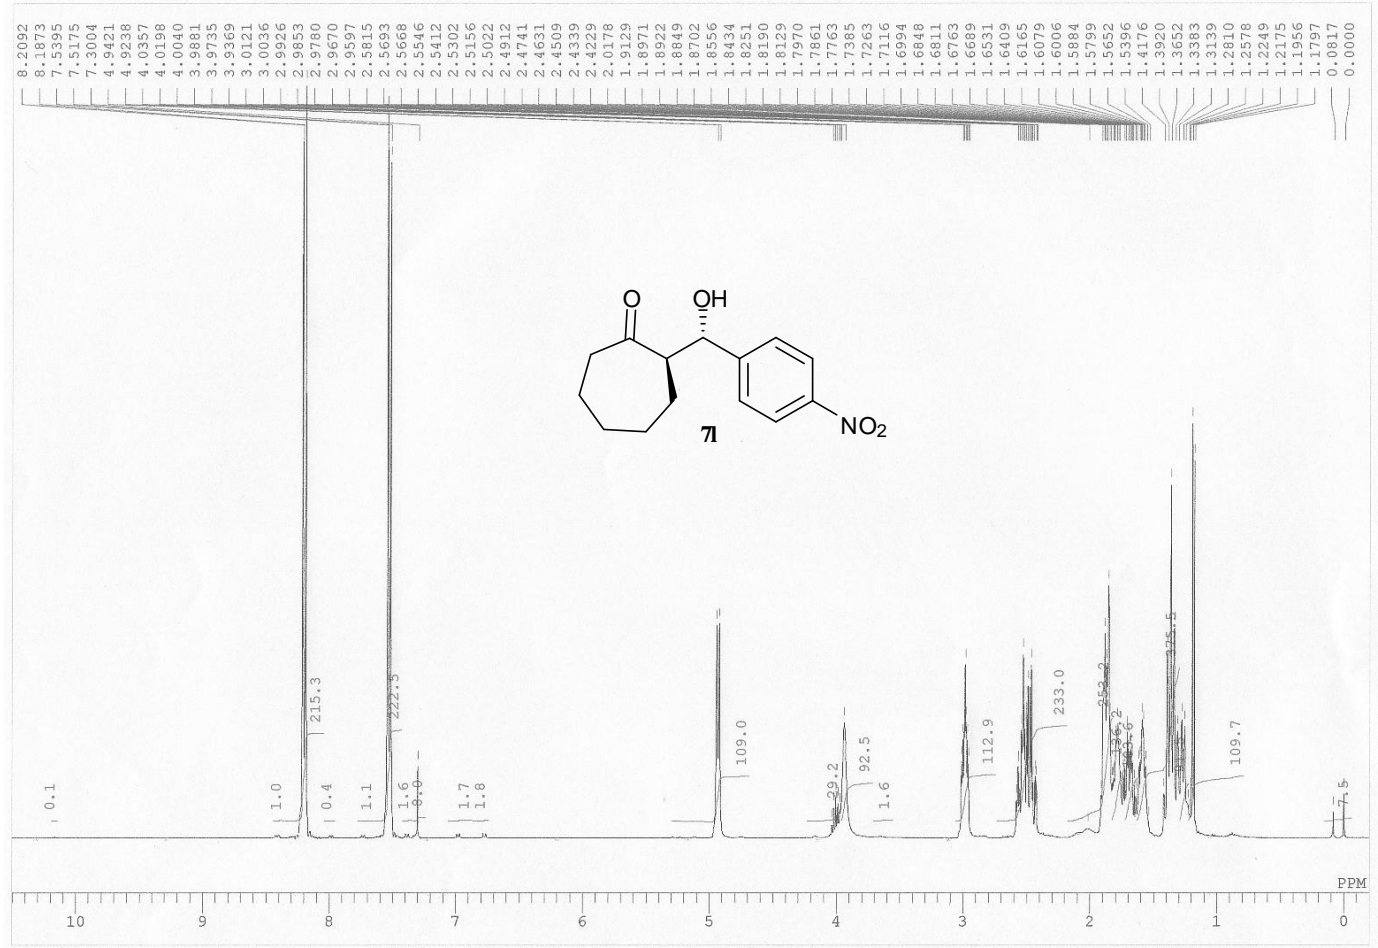

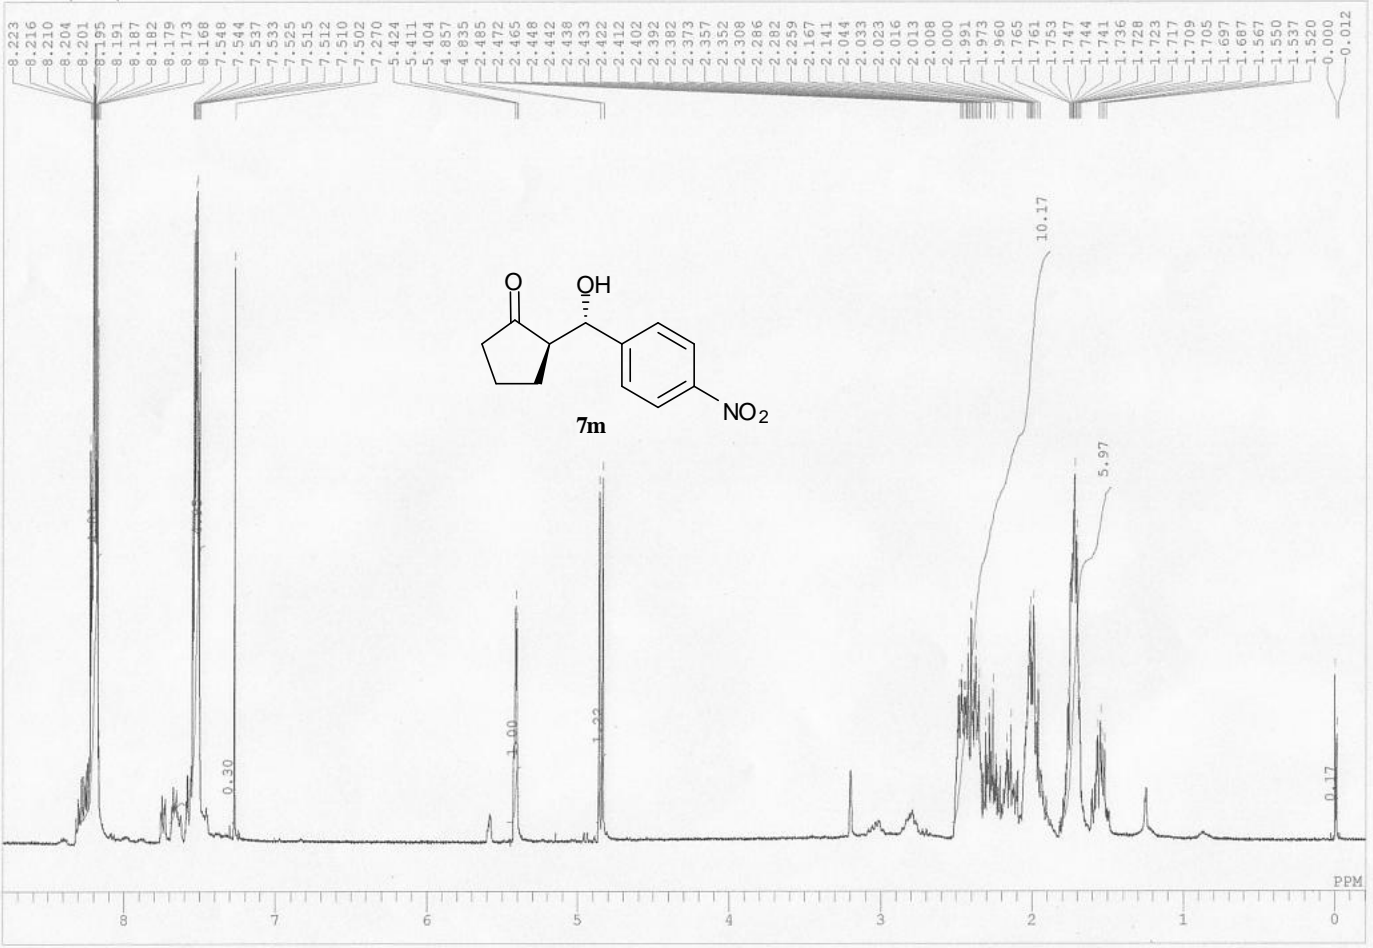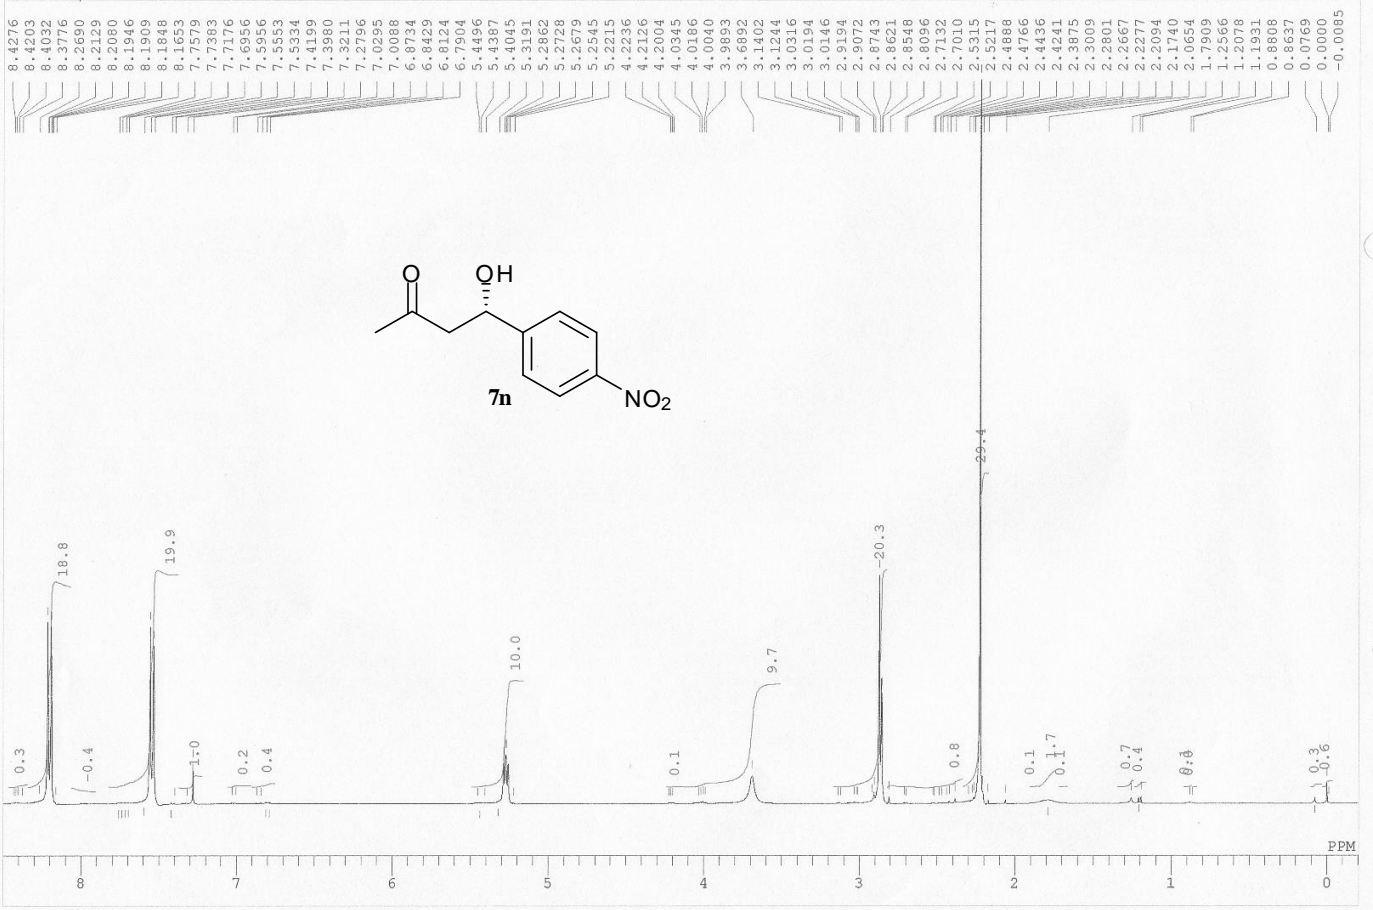

## 6. HPLC data

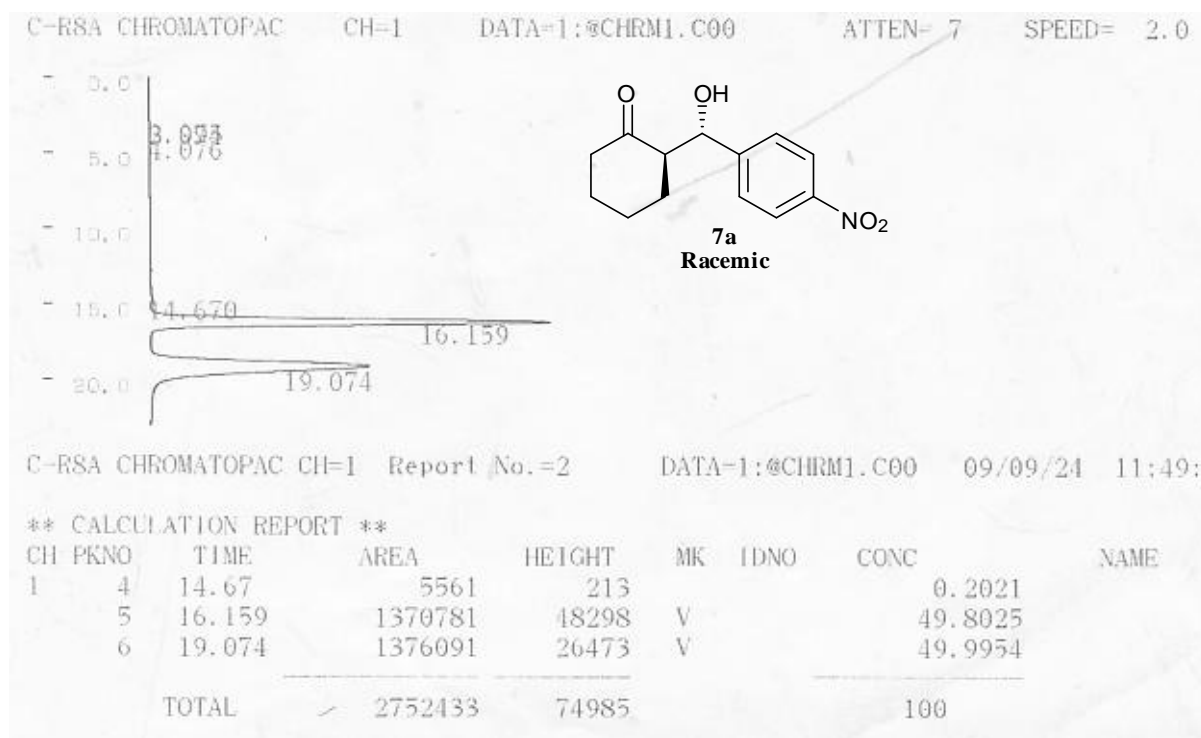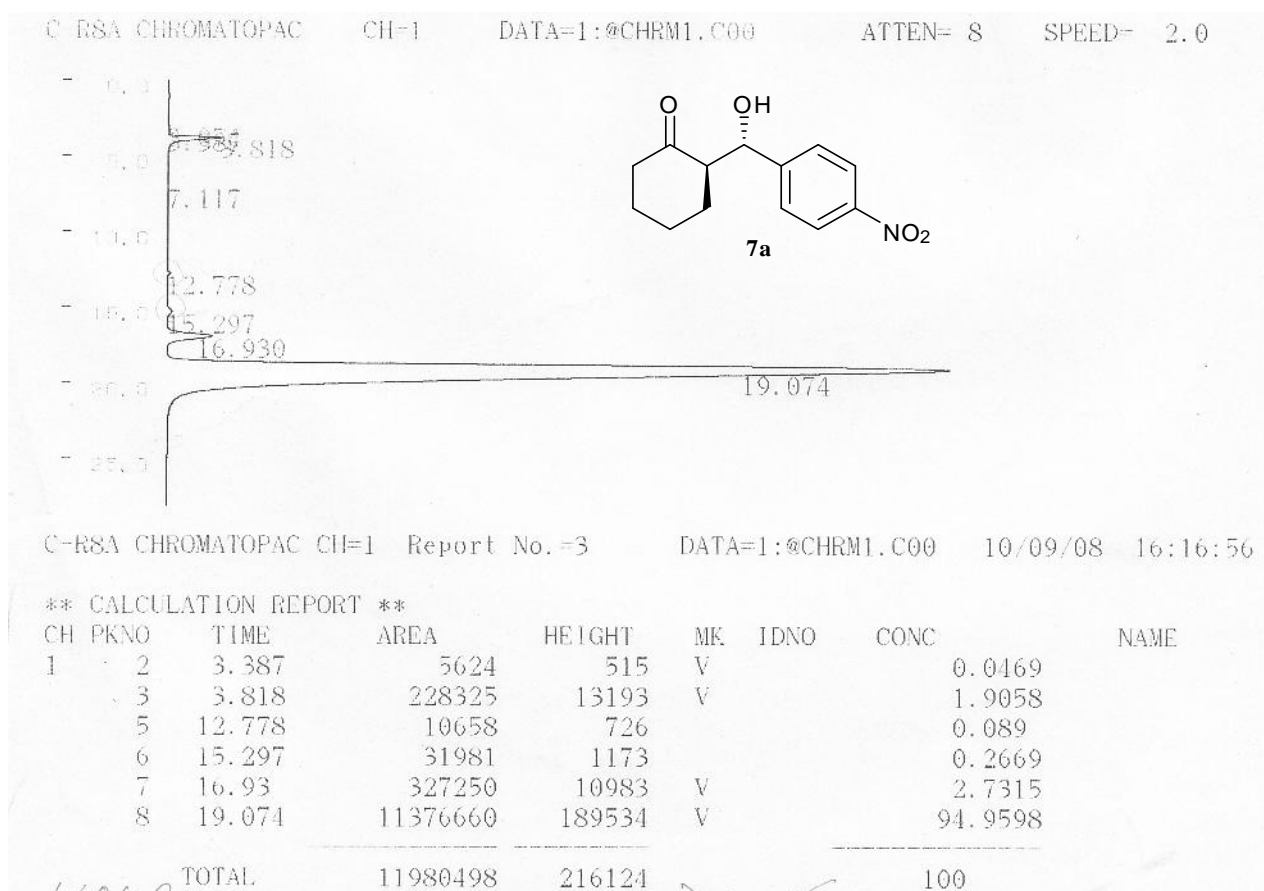



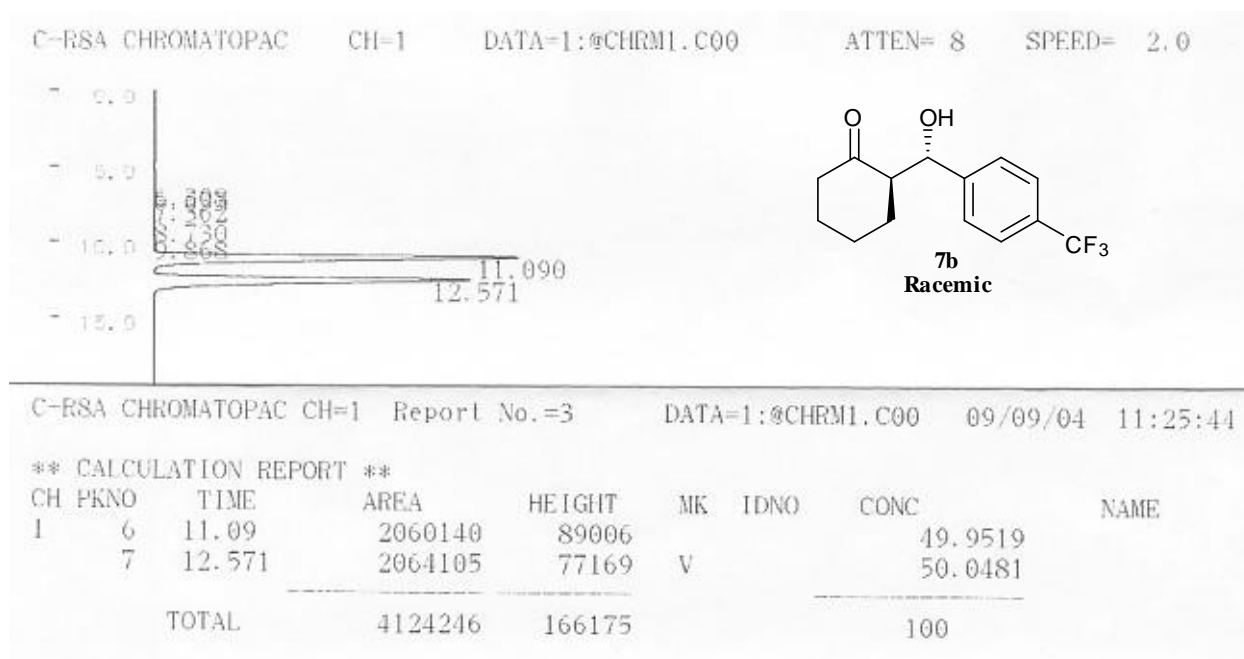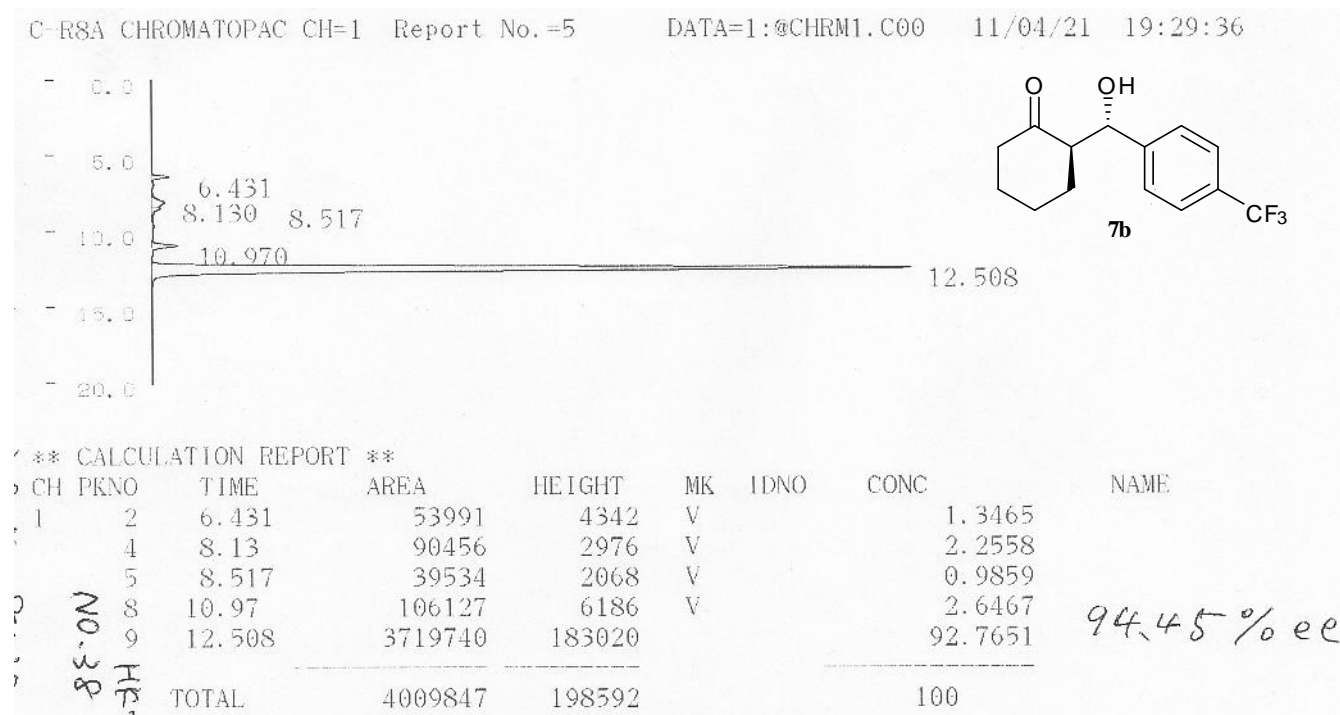

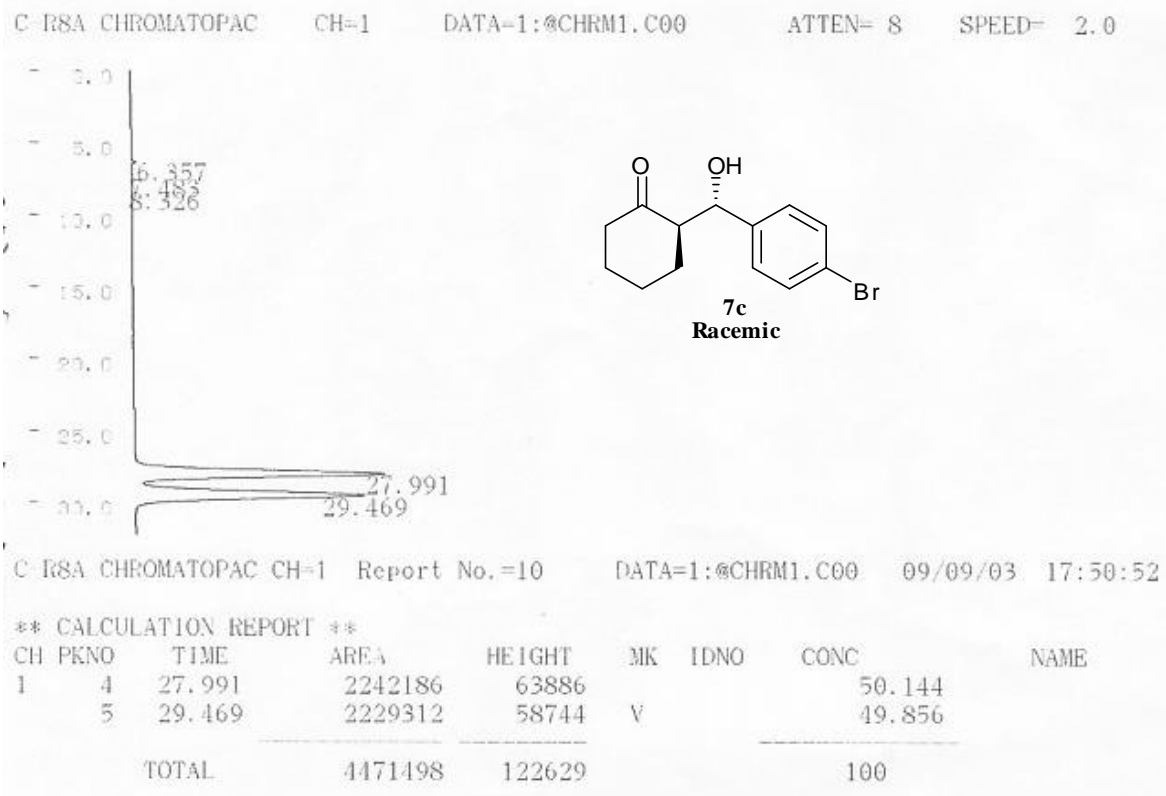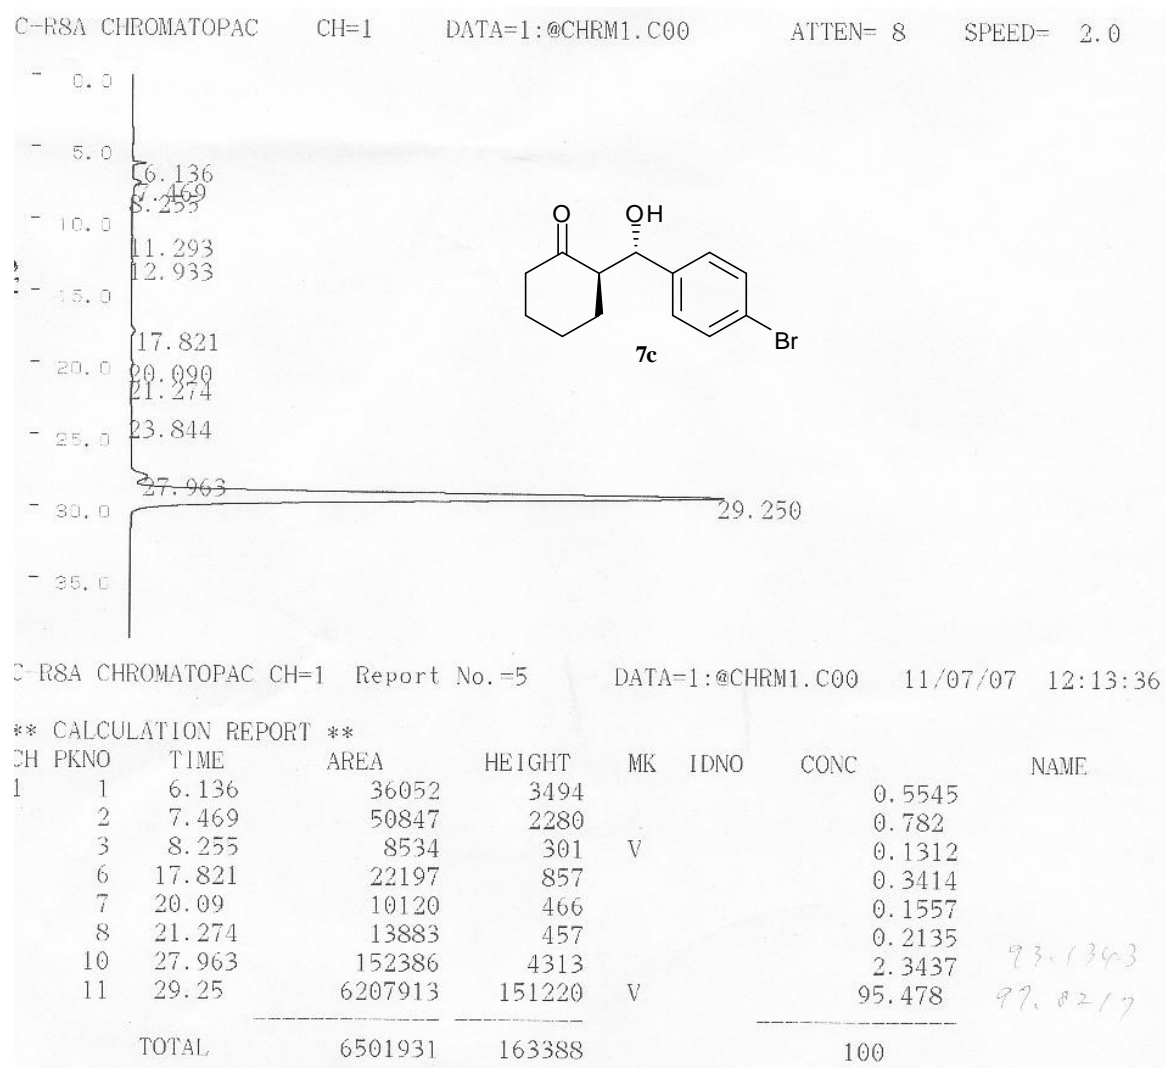

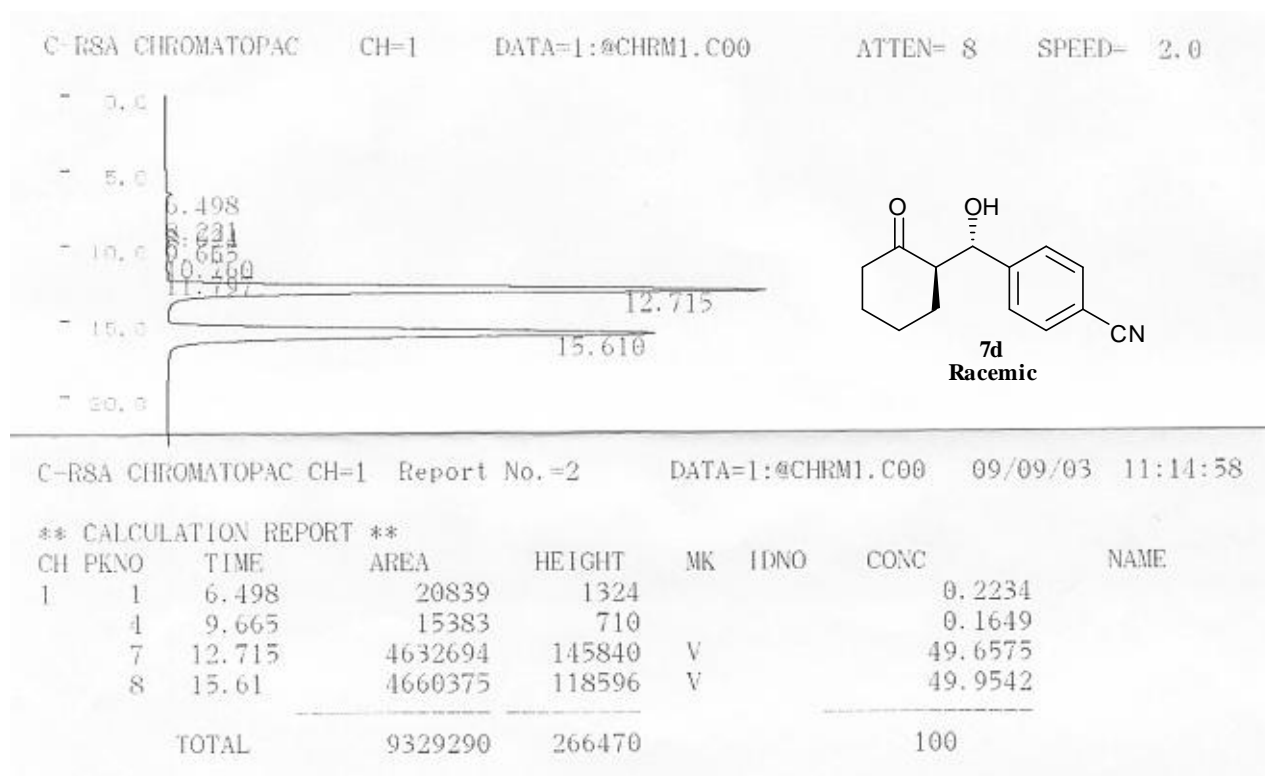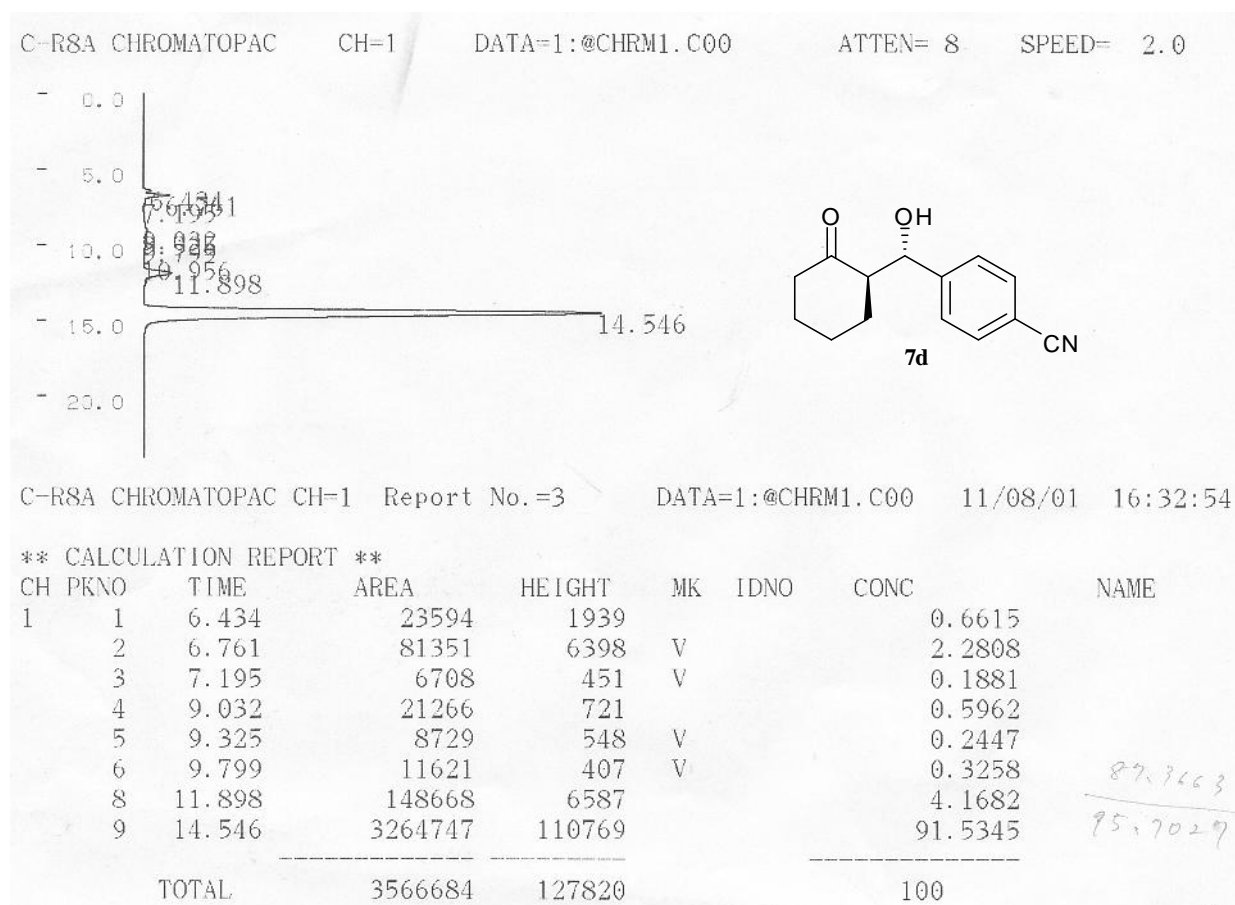



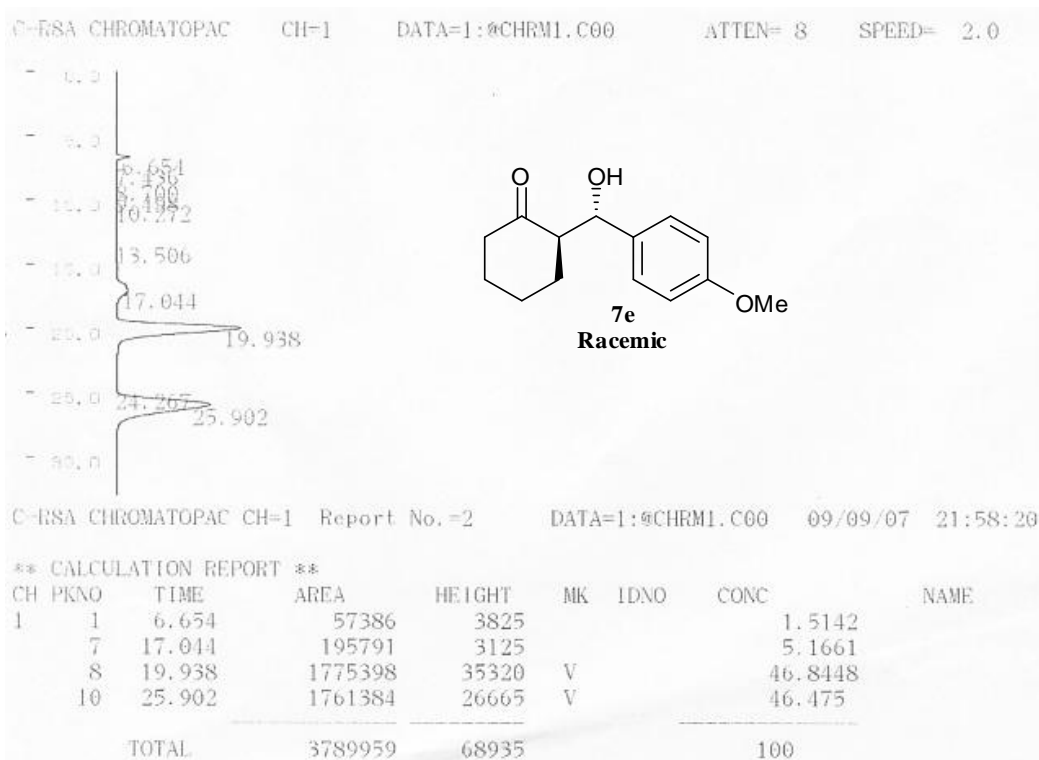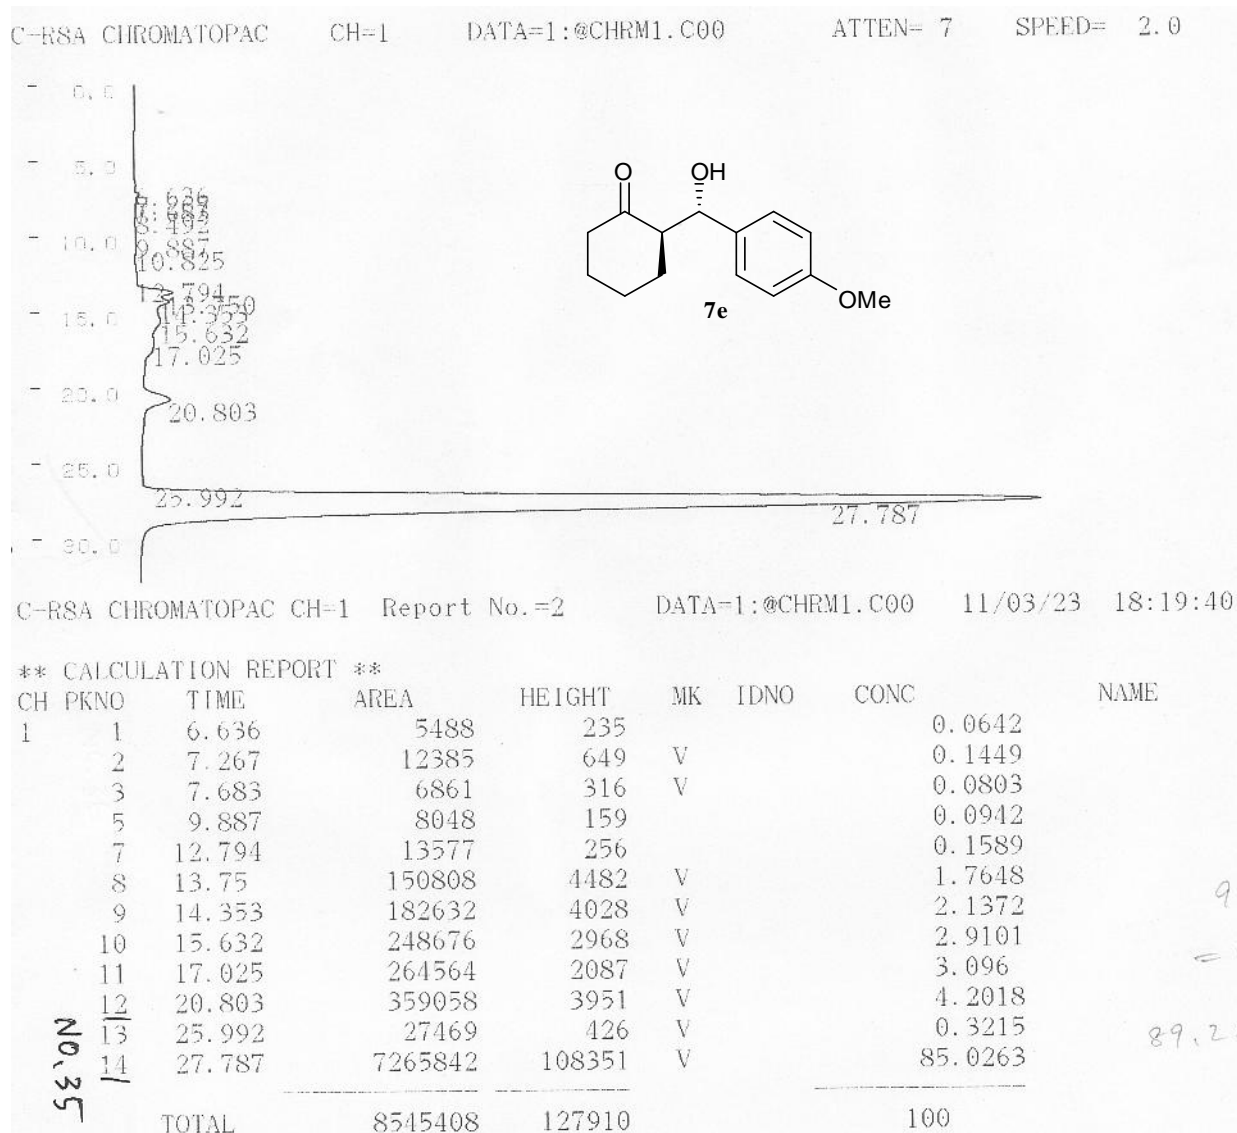

C-RSA CHROMATOPAC CH=1 DATA=1:@CHRM1.C00 ATTEN= 8 SPEED= 2.0

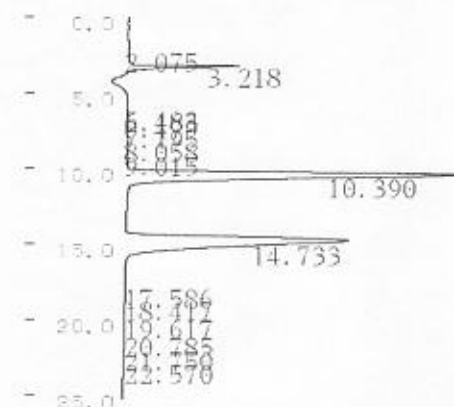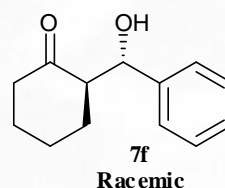

C-RSA CHROMATOPAC CH=1 Report No.=8 DATA=1:@CHRM1.C00 09/09/25 18:23

**\*\* CALCULATION REPORT \*\***

| CH    | PKNO | TIME   | AREA    | HEIGHT | MK | IDNO | CONC    | NAME |
|-------|------|--------|---------|--------|----|------|---------|------|
| 1     | 2    | 3.218  | 400051  | 28403  |    |      | 5.4461  |      |
|       | 3    | 5.483  | 301310  | 3558   |    |      | 4.1019  |      |
|       | 4    | 6.163  | 62715   | 3495   | V  |      | 0.8538  |      |
|       | 5    | 6.479  | 116759  | 3471   | V  |      | 1.5895  |      |
|       | 6    | 7.195  | 190503  | 3560   | V  |      | 2.5934  |      |
|       | 7    | 8.058  | 154835  | 3298   | V  |      | 2.1079  |      |
|       | 8    | 9.015  | 130366  | 3151   | V  |      | 1.7747  |      |
|       | 9    | 10.39  | 3031488 | 83240  | V  |      | 41.2695 |      |
|       | 10   | 14.733 | 2944585 | 56322  | SV |      | 40.0864 |      |
|       | 12   | 18.417 | 7446    | 119    | TV |      | 0.1014  |      |
|       | 14   | 20.785 | 5535    | 95     | TV |      | 0.0753  |      |
| TOTAL |      |        | 7345590 | 188713 |    |      | 100     |      |

RSA CHROMATOPAC CH=1 DATA=1:@CHRM1.C00 ATTEN= 7 SPEED= 2.0

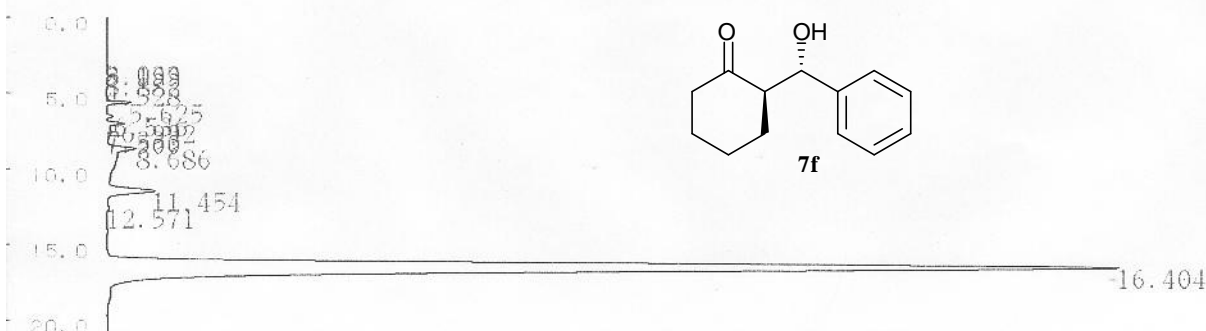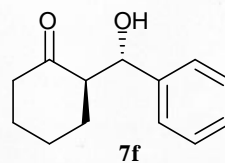

RSA CHROMATOPAC CH=1 Report No.=3 DATA=1:@CHRM1.C00 11/04/13 21:27:32

**\*\* CALCULATION REPORT \*\***

| CH    | PKNO | TIME   | AREA    | HEIGHT | MK | IDNO | CONC    | NAME |
|-------|------|--------|---------|--------|----|------|---------|------|
|       | 2    | 3.199  | 1482    | 212    | V  |      | 0.03    |      |
|       | 3    | 3.882  | 4406    | 566    |    |      | 0.0892  |      |
|       | 4    | 4.528  | 2331    | 219    |    |      | 0.0472  |      |
|       | 5    | 5.625  | 35927   | 3083   |    |      | 0.727   |      |
|       | 6    | 6.536  | 10805   | 807    |    |      | 0.2186  |      |
|       | 7    | 6.992  | 27585   | 2055   | V  |      | 0.5582  |      |
|       | 8    | 7.333  | 3878    | 346    | V  |      | 0.0785  |      |
|       | 9    | 7.56   | 10118   | 367    | V  |      | 0.2047  |      |
|       | 10   | 8.686  | 49023   | 2845   |    |      | 0.9919  |      |
|       | 11   | 11.454 | 132638  | 5632   |    |      | 2.6839  |      |
|       | 12   | 12.571 | 4585    | 215    |    |      | 0.0928  |      |
|       | 13   | 16.404 | 4659304 | 121911 |    |      | 94.2781 |      |
| TOTAL |      |        | 4942082 | 138257 |    |      | 100     |      |

94.46

96.962

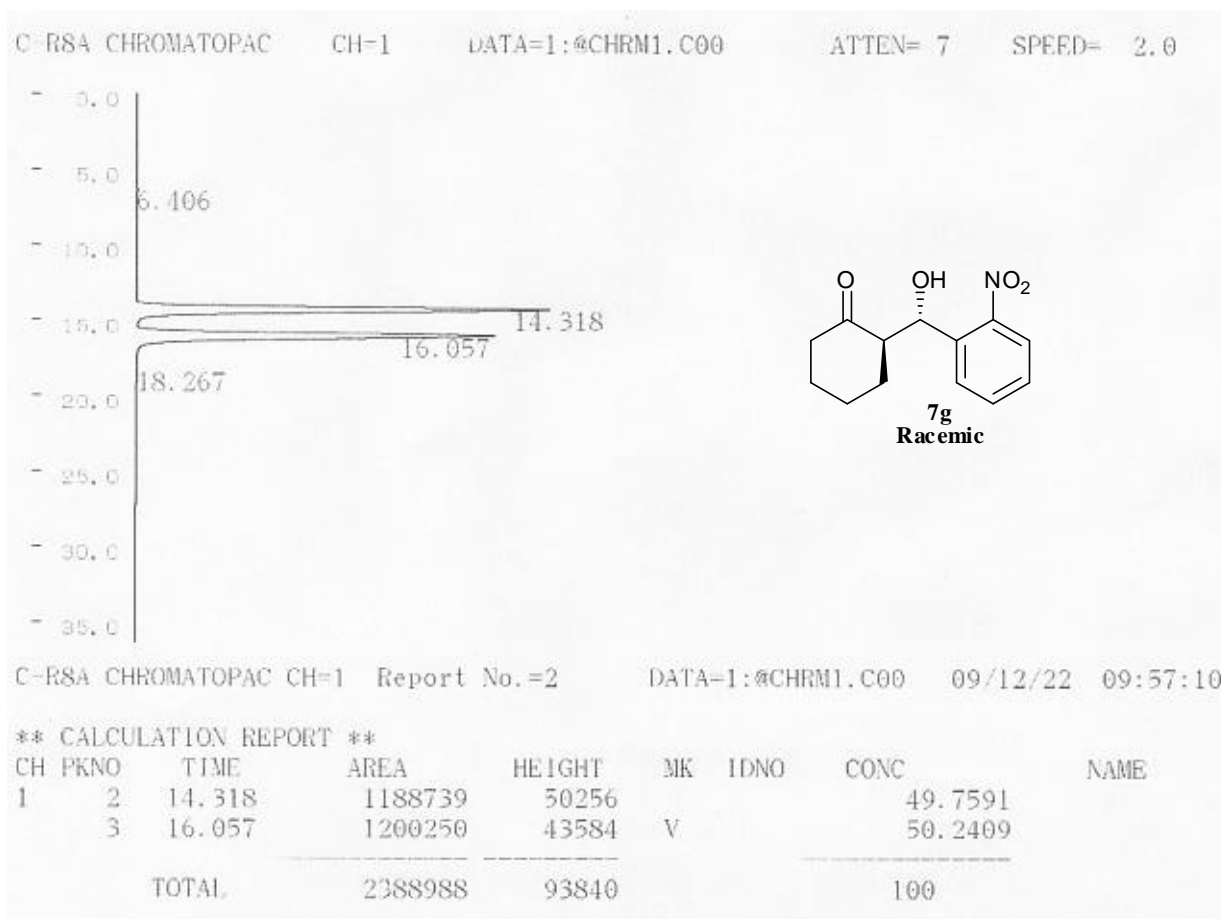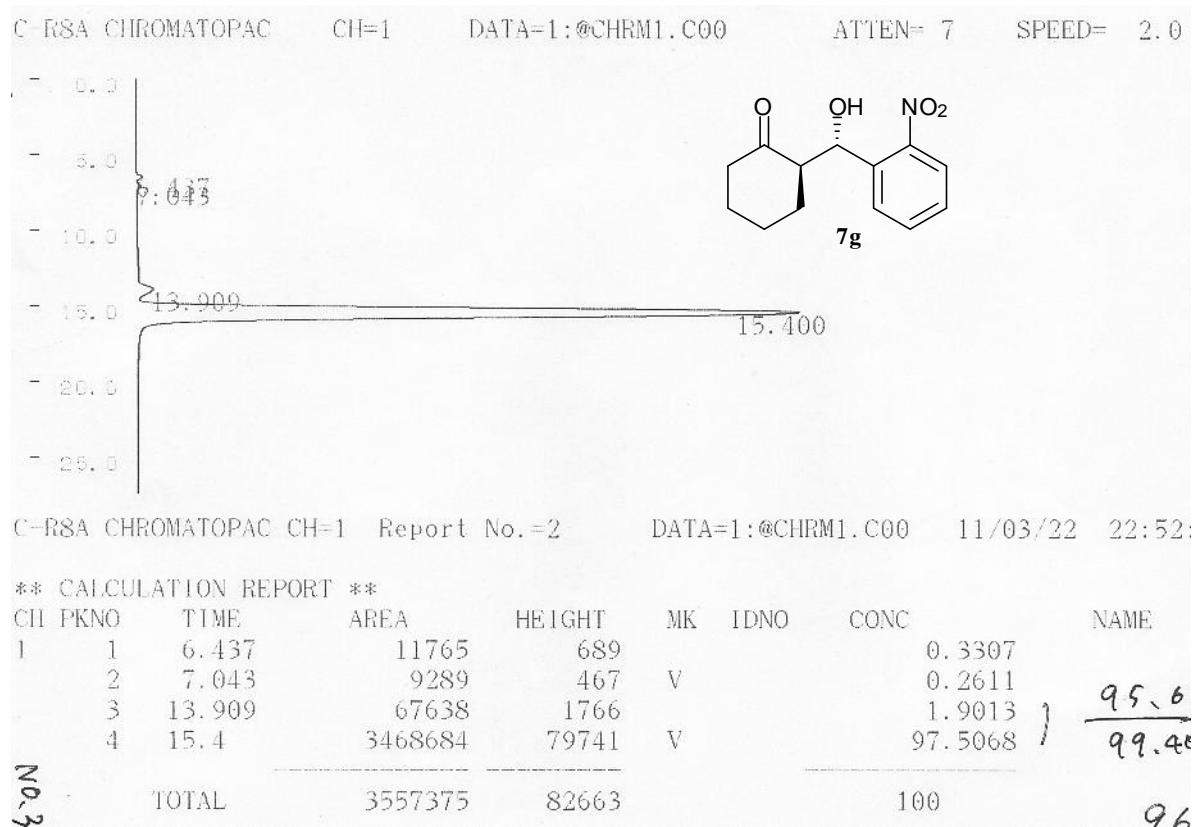

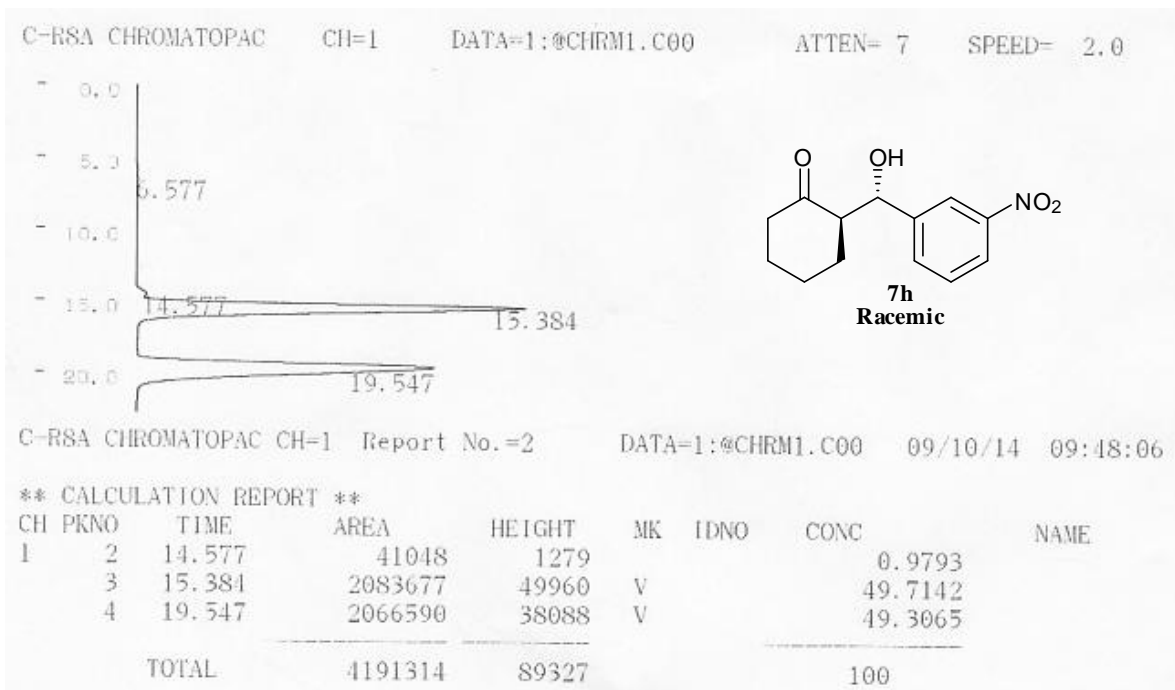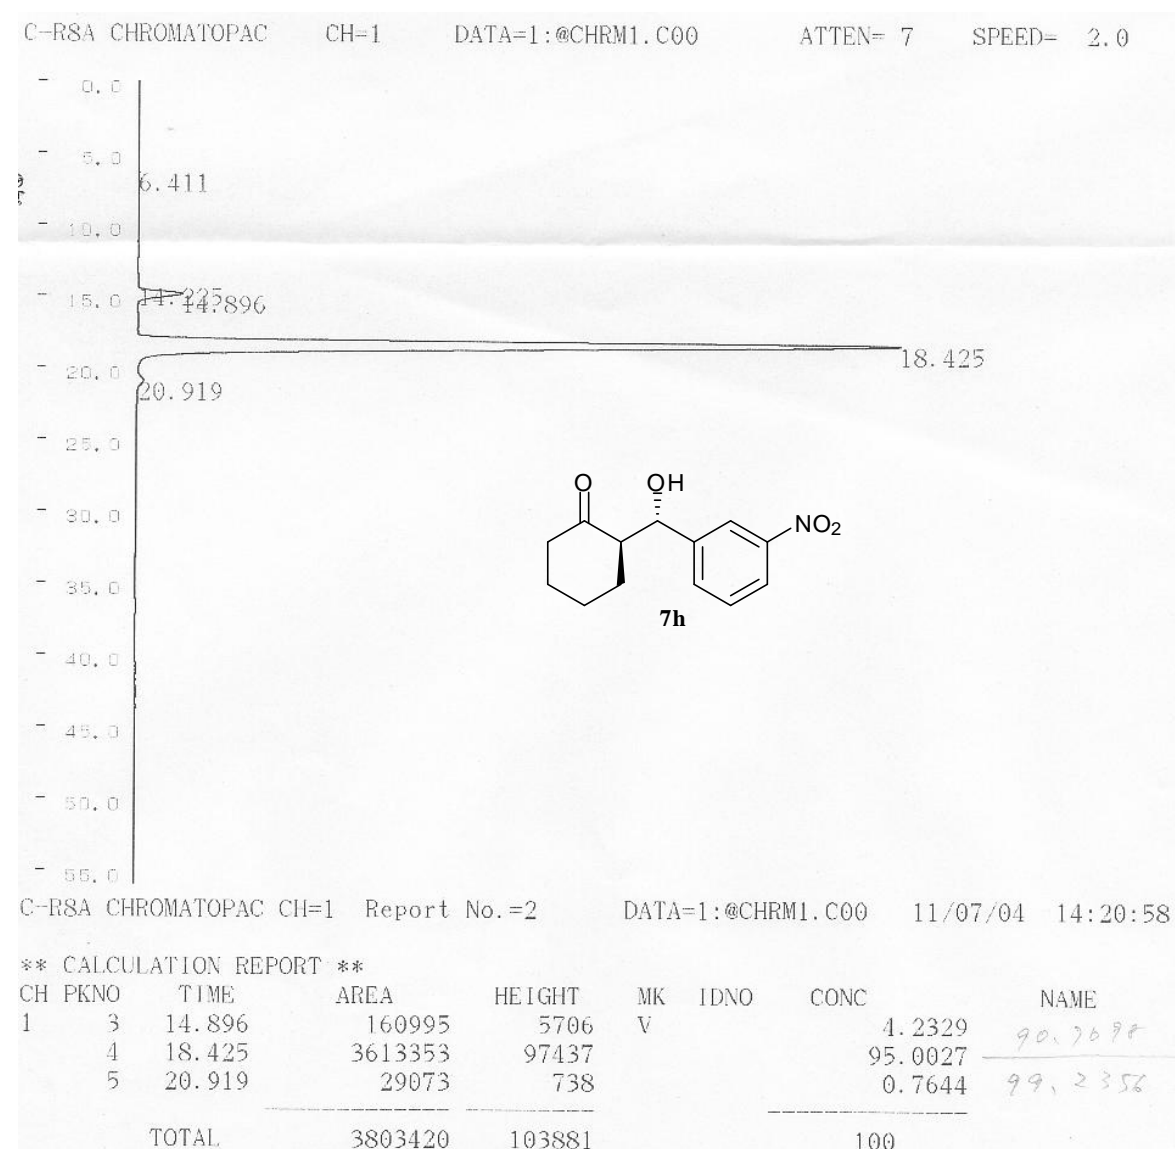



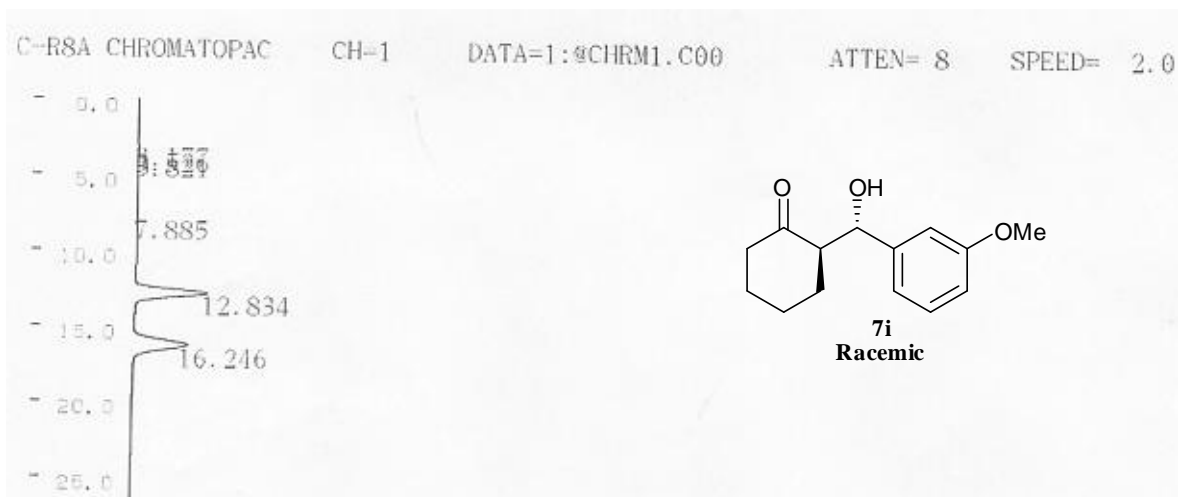

C-RSA CHROMATOPAC CH=1 Report No.=5 DATA=1:@CHRM1.C00 09/10/08 13:05:24

**\*\* CALCULATION REPORT \*\***

| CH    | PKNO | TIME   | AREA    | HEIGHT | MK | IDNO | CONC    | NAME |
|-------|------|--------|---------|--------|----|------|---------|------|
| 1     | 5    | 12.834 | 623776  | 17618  |    |      | 49.9004 |      |
|       | 6    | 16.246 | 626267  | 13154  |    |      | 50.0996 |      |
| TOTAL |      |        | 1250043 | 30772  |    |      | 100     |      |

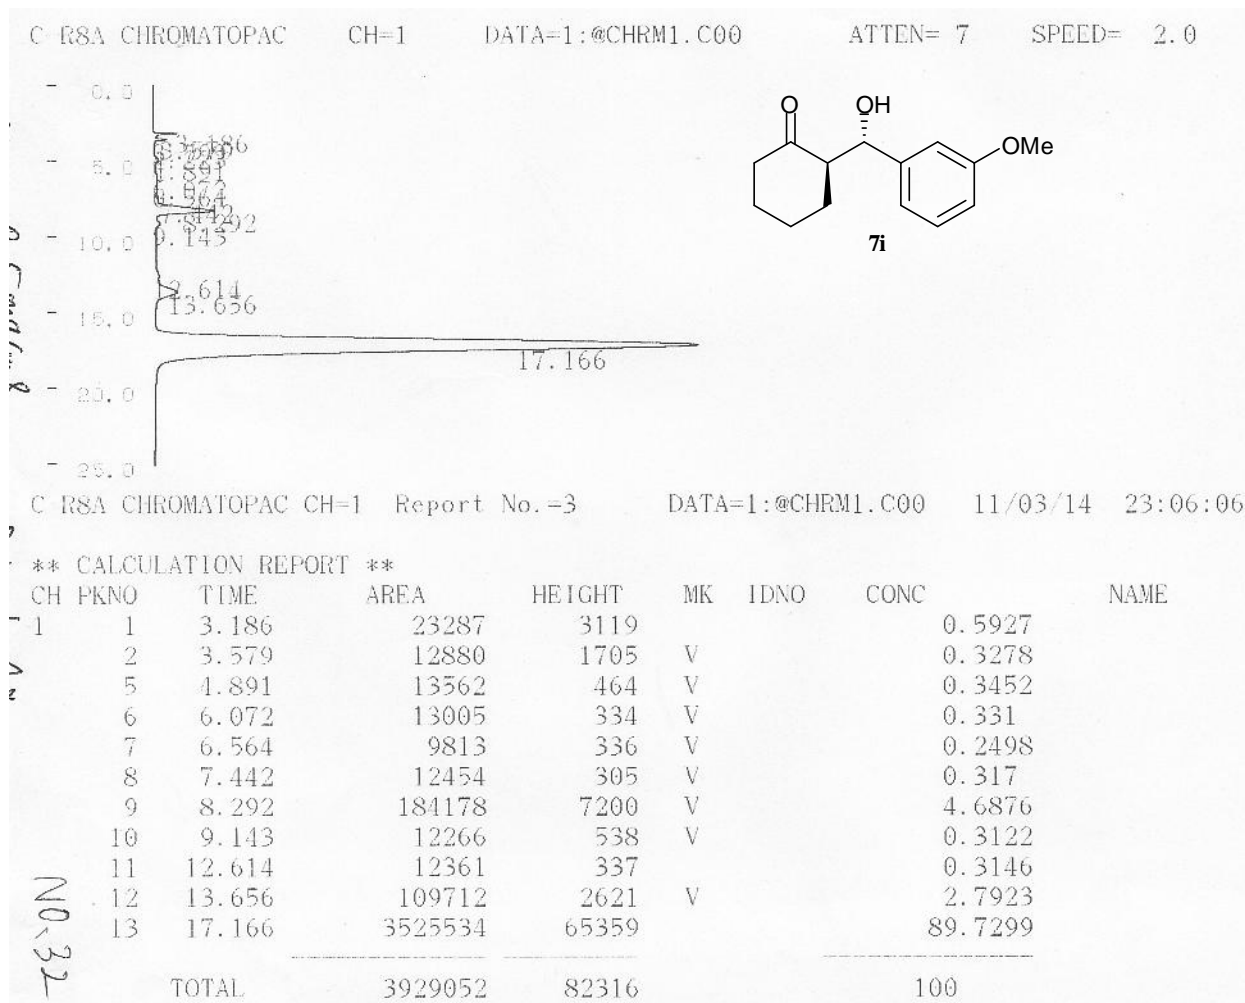

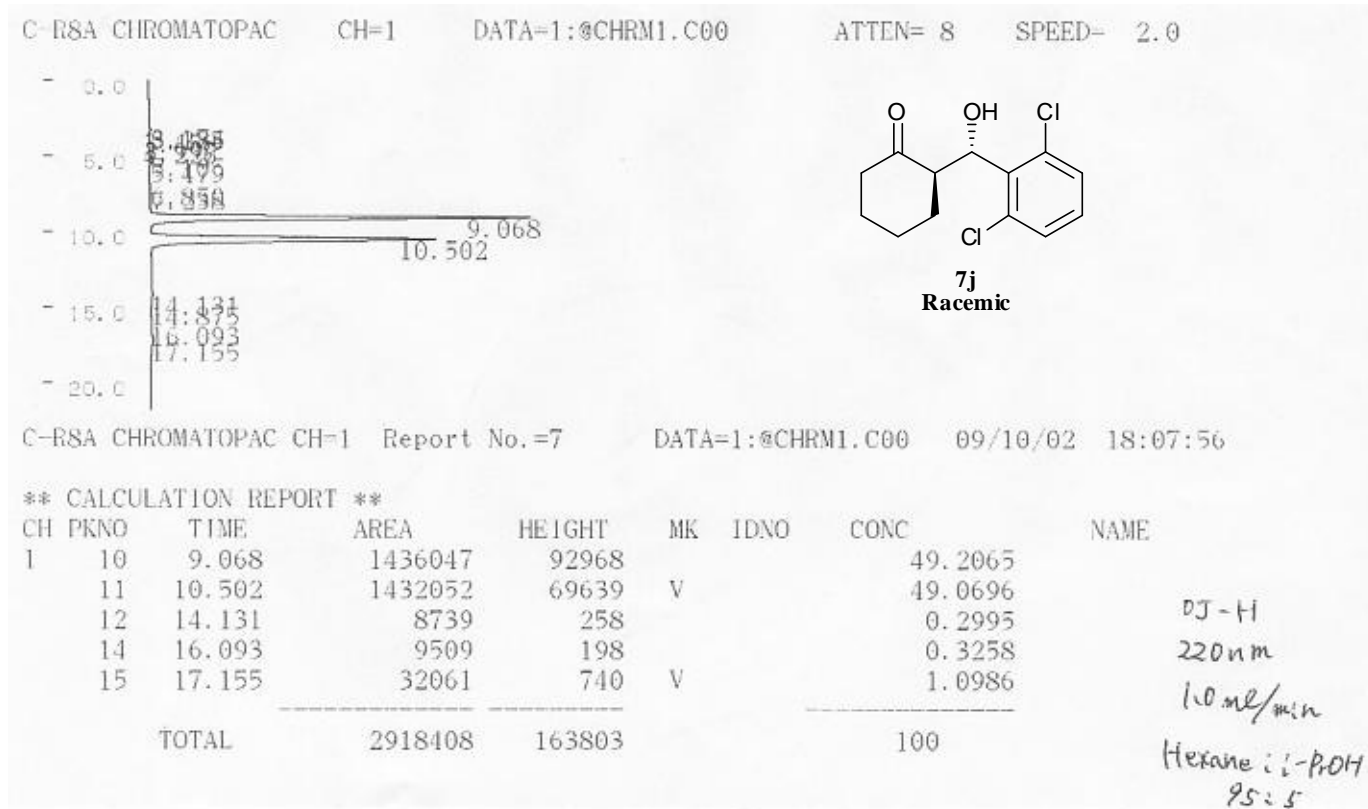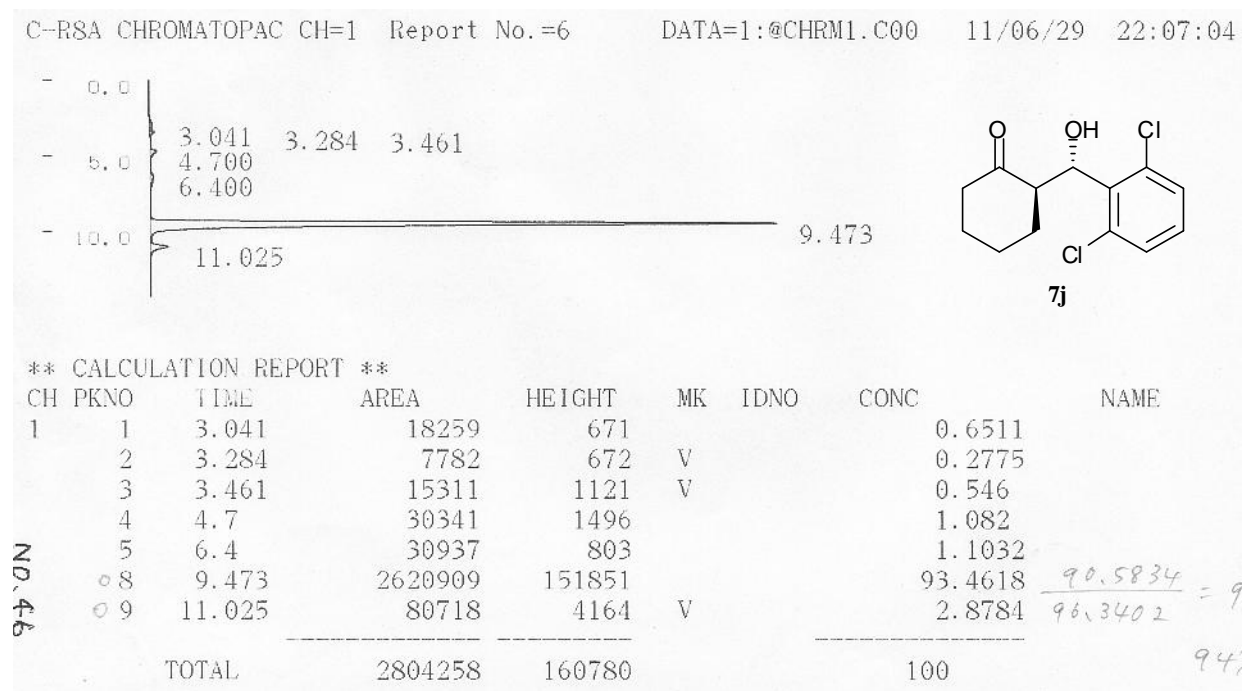

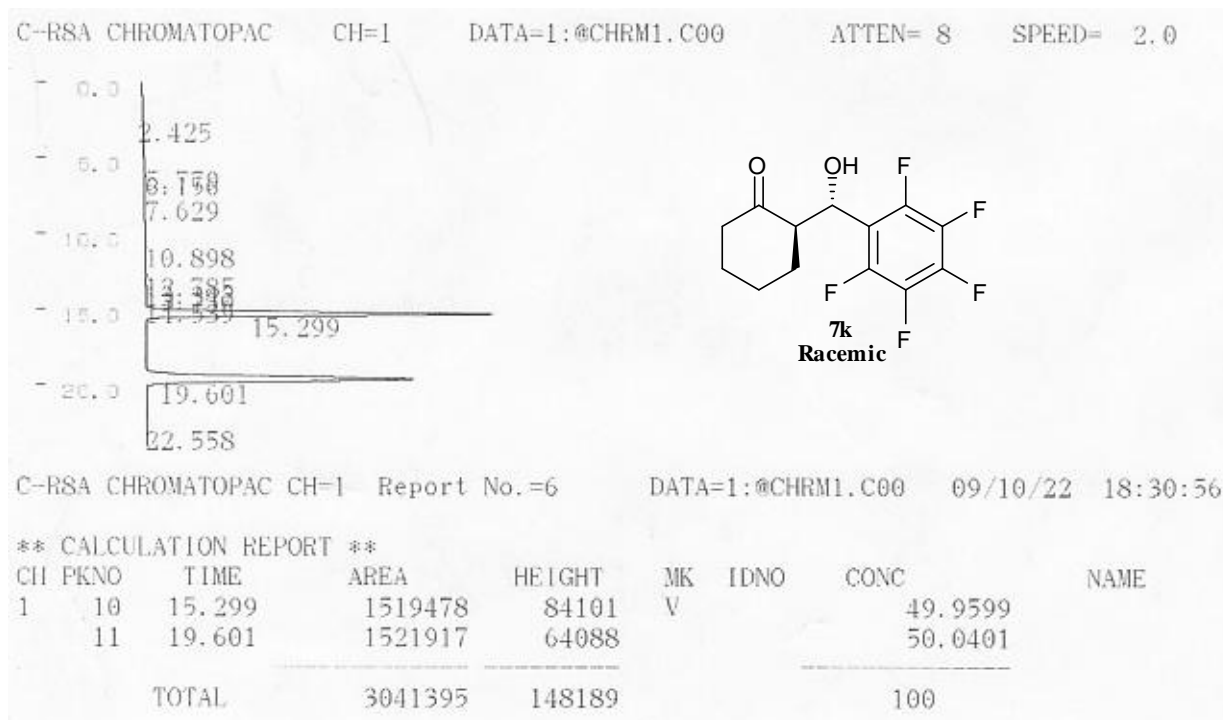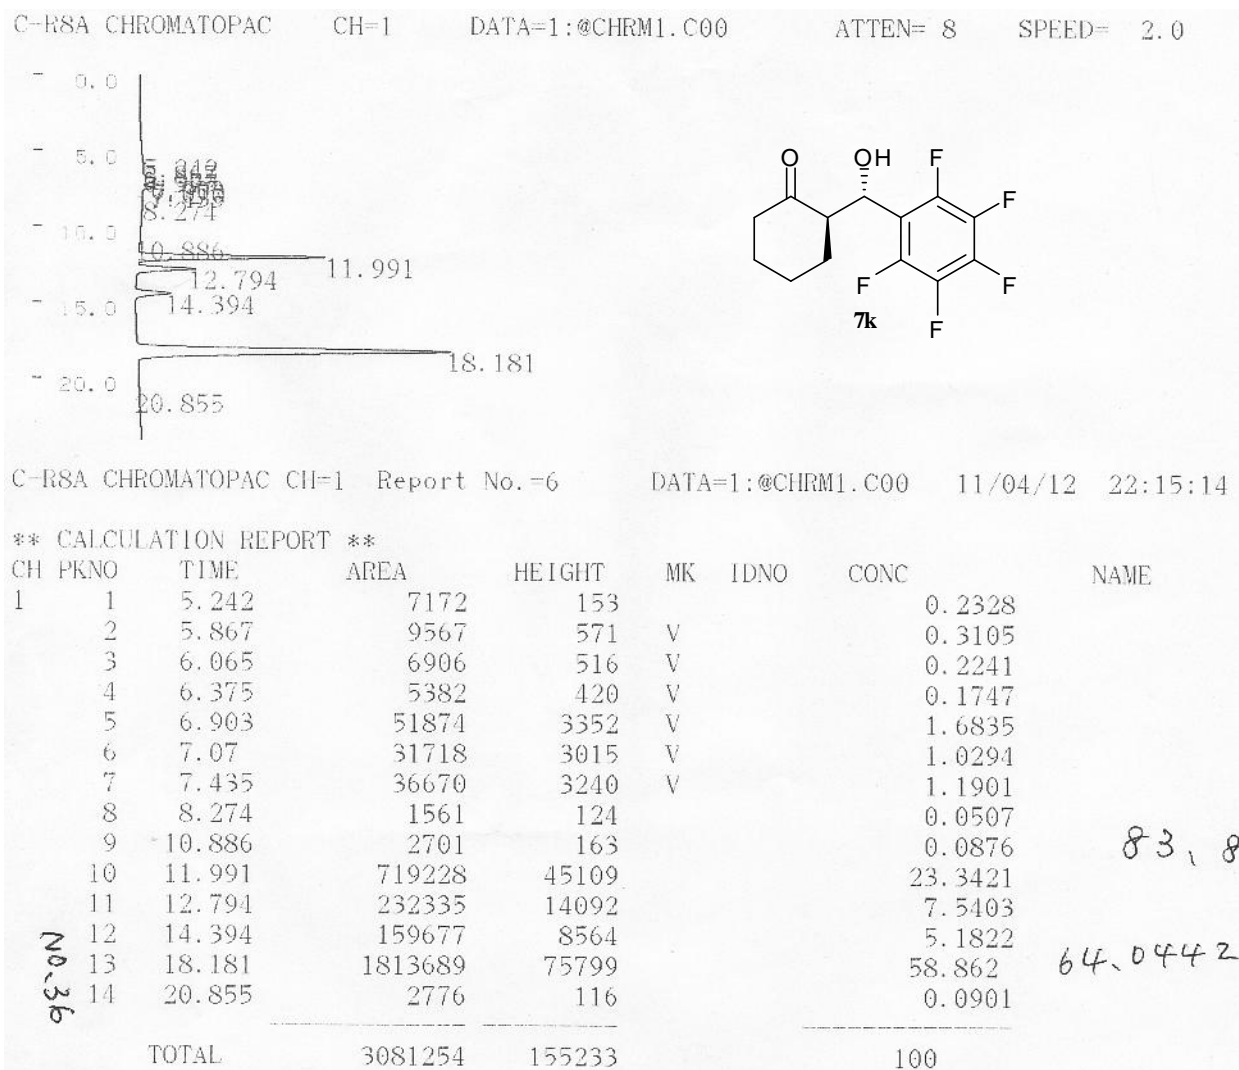

C-RSA CHROMATOPAC CH=1 Report No.=5

DATA=1:@CHRM1.C00

10/09/01 11:23:10

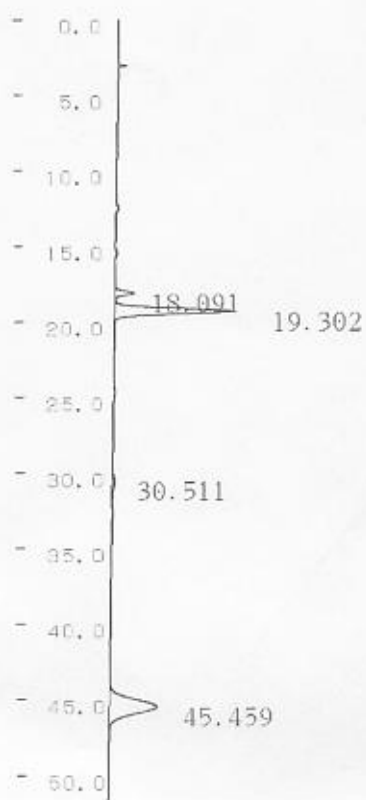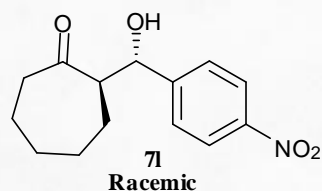

\*\* CALCULATION REPORT \*\*

| CH    | PKNO | TIME   | AREA   | HEIGHT | MK | IDNO | CONC    | NAME |
|-------|------|--------|--------|--------|----|------|---------|------|
| 1     | 5    | 18.091 | 23549  | 1189   |    |      | 5.6733  |      |
|       | 6    | 19.302 | 191969 | 7081   |    |      | 46.2484 |      |
|       | 8    | 30.511 | 6725   | 147    |    |      | 1.6202  |      |
|       | 10   | 45.459 | 192840 | 2896   |    |      | 46.4581 |      |
| TOTAL |      |        | 415083 | 11313  |    |      | 100     |      |



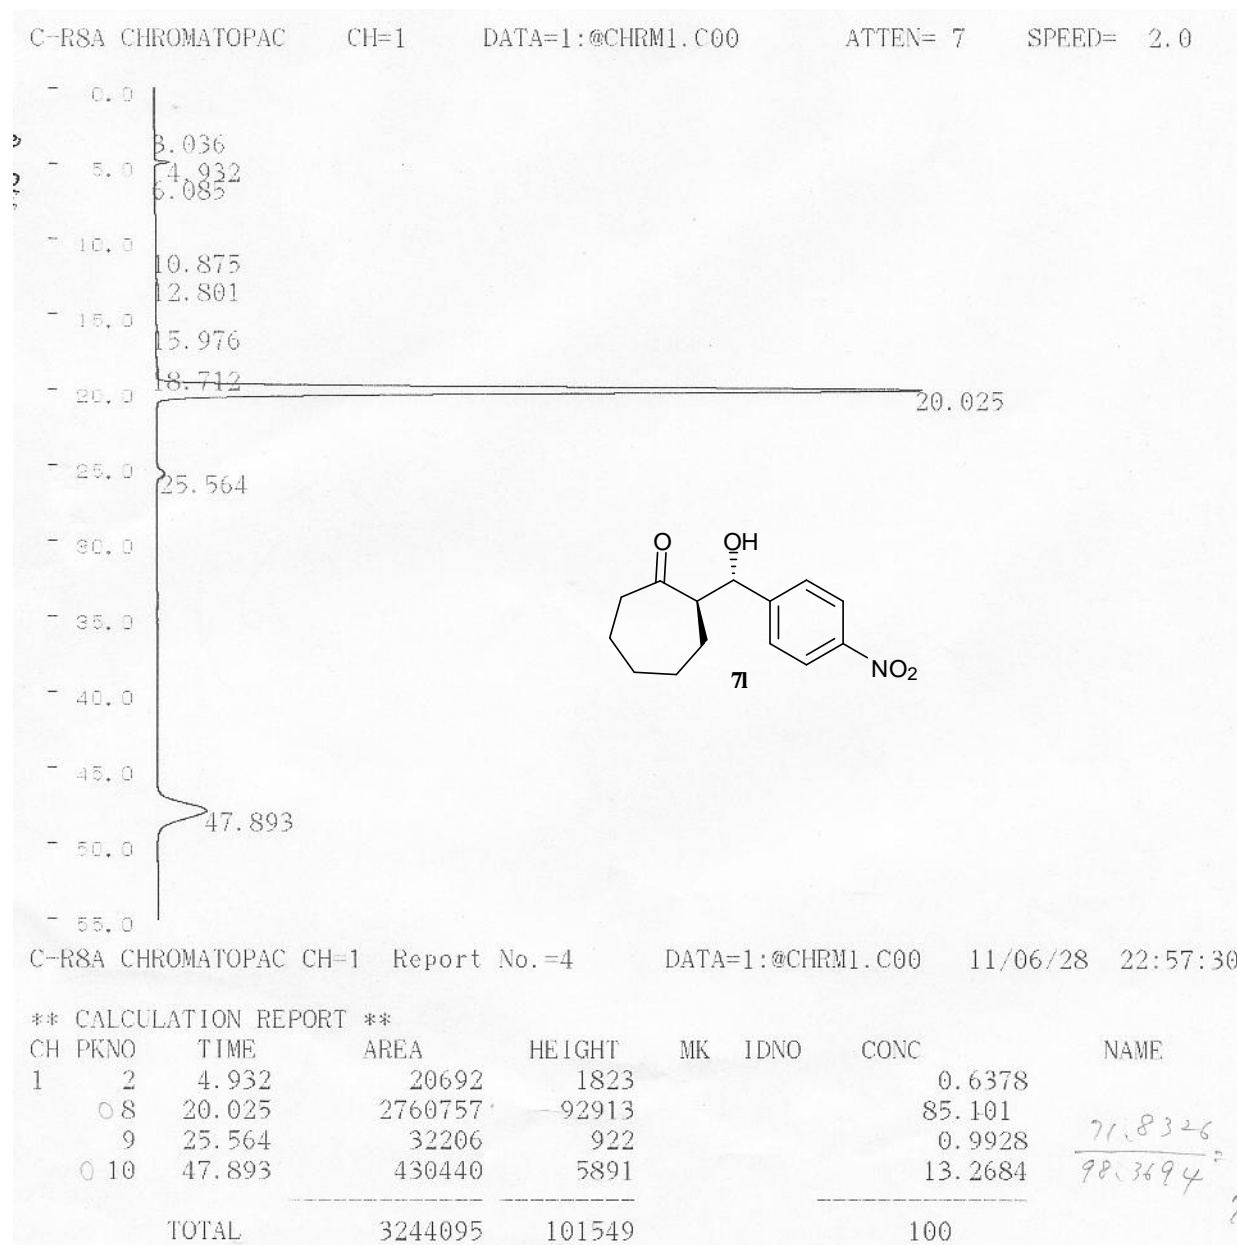

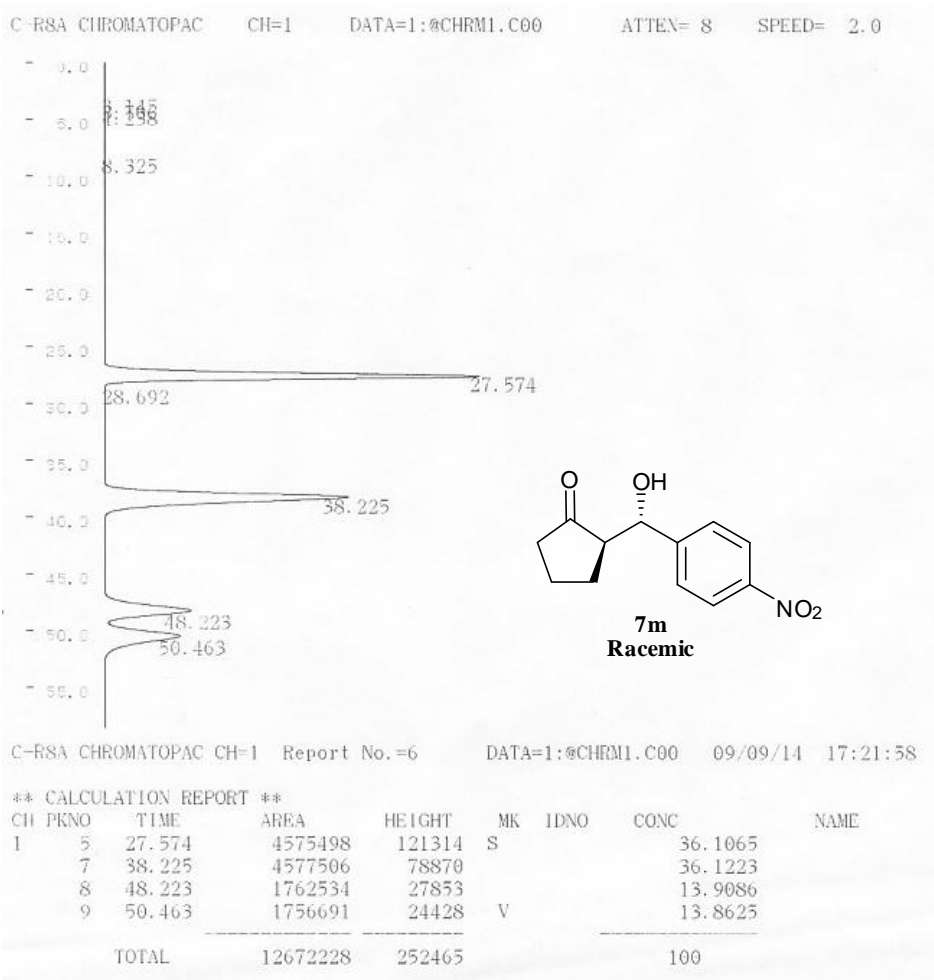

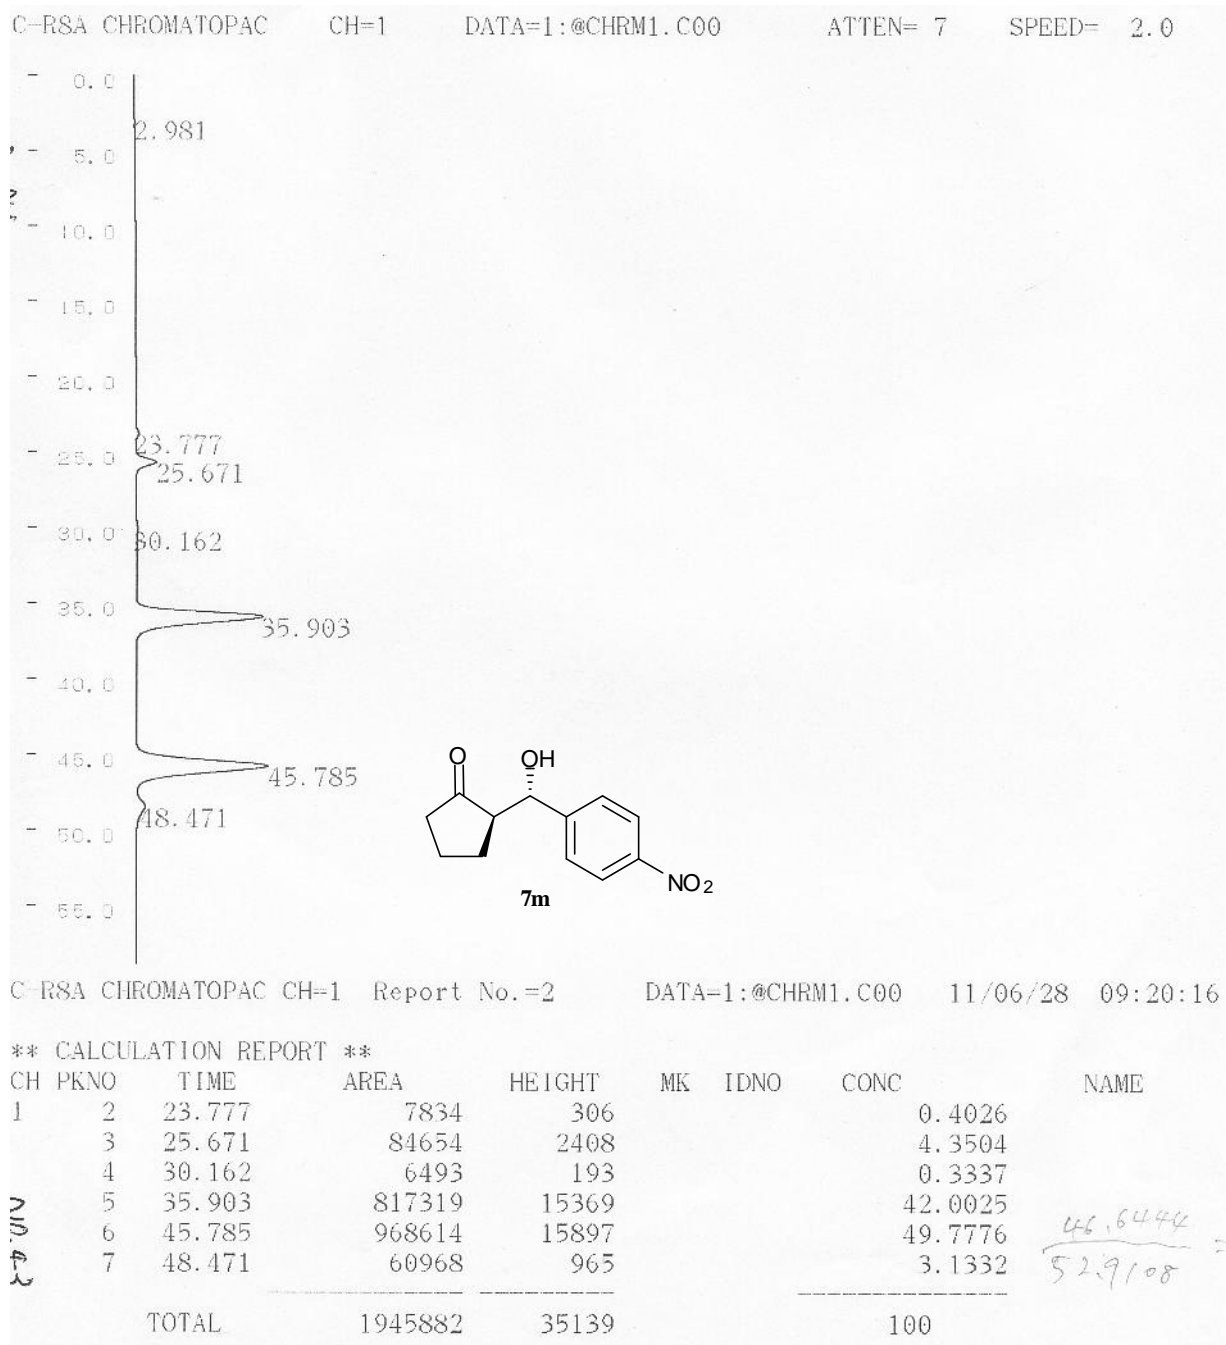

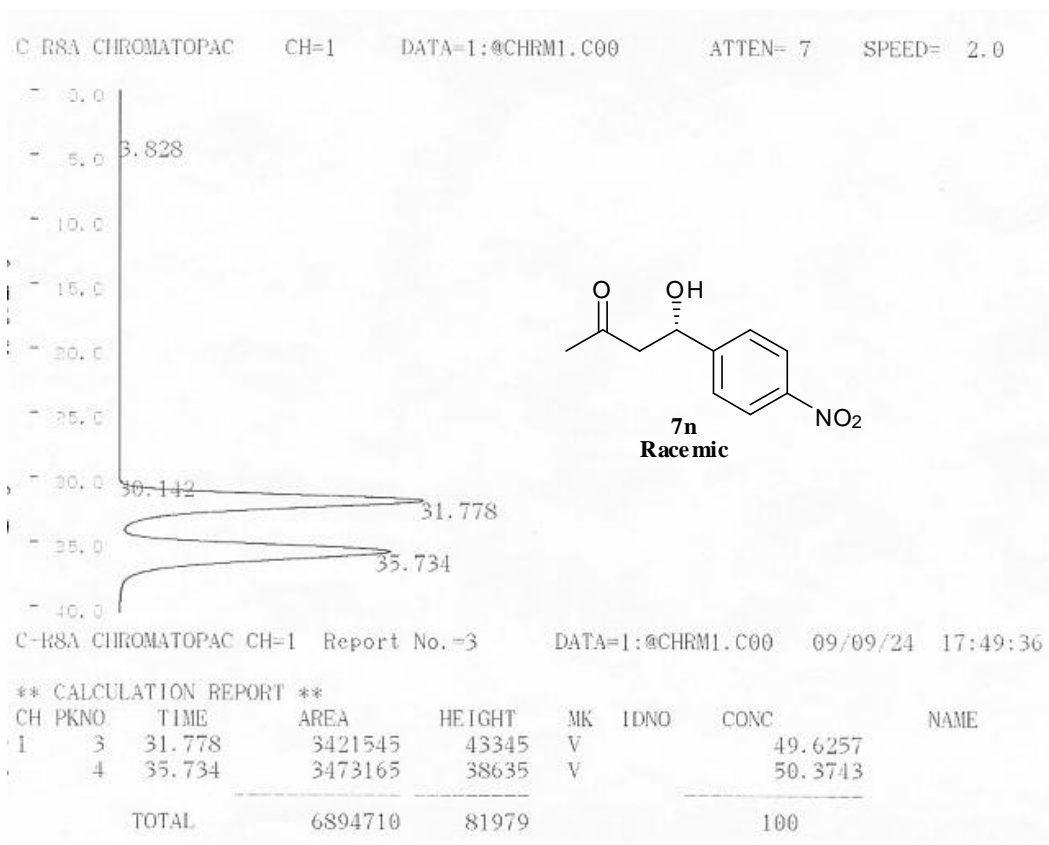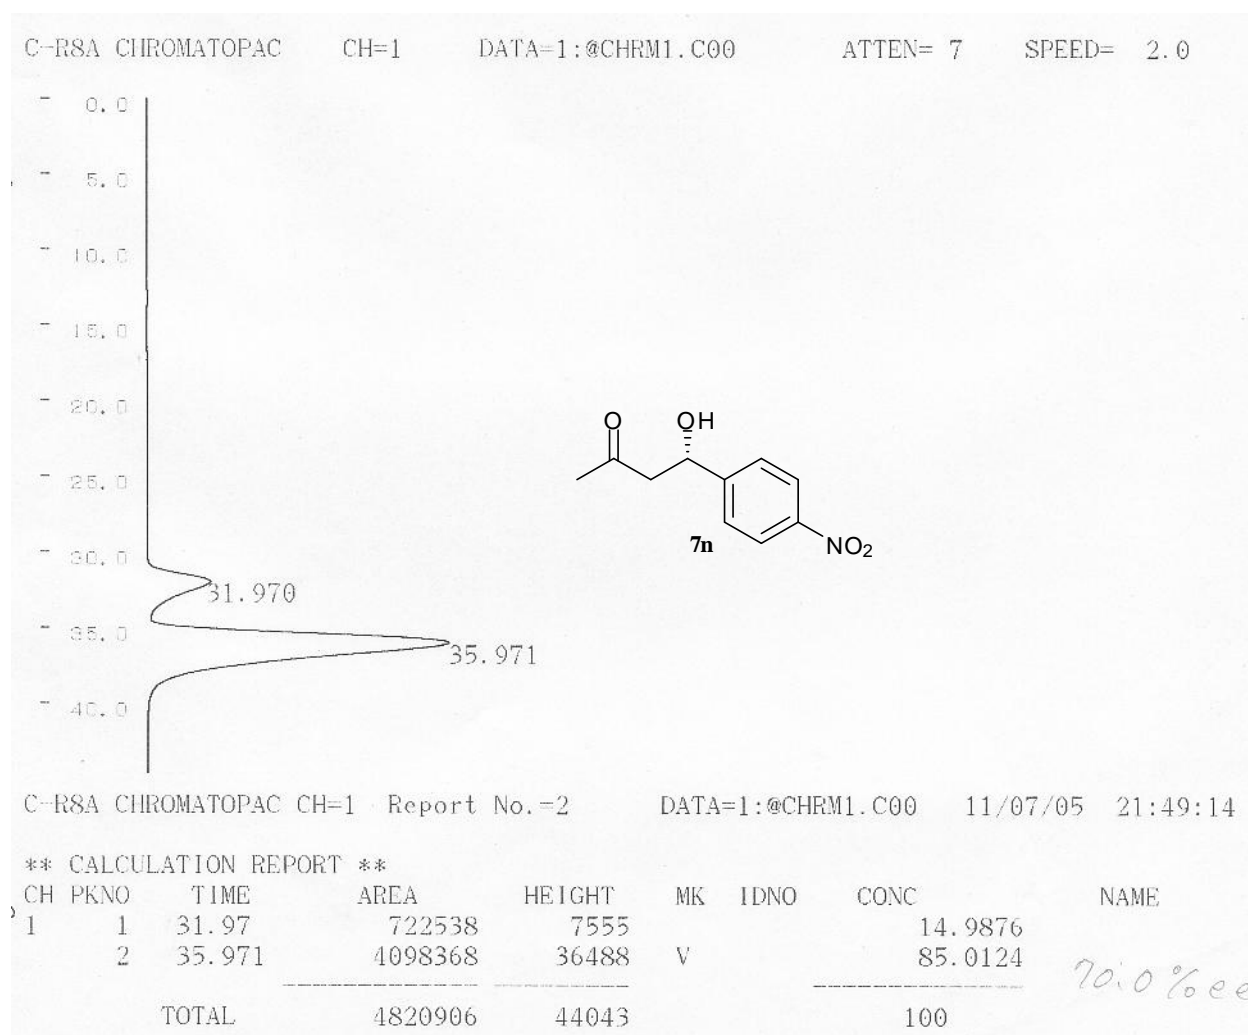

Supplement: c2ob06955e.pdf [file c2ob06955e.pdf]
